# Supplementary material for: A bioenergetics approach to understanding sex differences in the foraging behaviour of a sexually monomorphic species
Source: PubMed Central journal article supplement (PMC8790366; doi:10.1098/rsos.210520), 2022-01-26
Supplement: rsos210520_review_history.pdf [file rsos210520_review_history.pdf]

## **A bioenergetics approach to understanding sex differences in the foraging behaviour of a sexually monomorphic species**

Ashley Bennison, Joan Giménez, John L. Quinn, Jonathan A. Green and Mark Jessopp

### **Article citation details**

*R. Soc. open sci.* **9**: 210520.

<http://dx.doi.org/10.1098/rsos.210520>

### **Review timeline**

Original submission: 13 April 2021  
1st revised submission: 26 November 2021  
2nd revised submission: 21 December 2021  
Final acceptance: 22 December 2021

Note: Reports are unedited and appear as submitted by the referee. The review history appears in chronological order.

Note: This manuscript was transferred from another Royal Society journal without peer review.

## Review History

### RSOS-210520.R0 (Original submission)

#### Review form: Reviewer 1

**Is the manuscript scientifically sound in its present form?**

Yes

**Are the interpretations and conclusions justified by the results?**

Yes

**Is the language acceptable?**

Yes

**Do you have any ethical concerns with this paper?**

No

## Have you any concerns about statistical analyses in this paper?

No

## Recommendation?

Accept with minor revision (please list in comments)

## Comments to the Author(s)

I really enjoyed reading this manuscript! Well done. The introduction was great and flowed nicely, providing a background into sex-specific differences in foraging behaviour, its potential drivers (energy expenditure and diet), the methods used to investigate this and your study system. This set the manuscript up well.

Are you able to provide any further information regarding the “marginal” sex differences in weight observed in gannets, that you mention within your introduction? Are the other sex differences in gannets that you mention (foraging behaviour and diet) considered to be ubiquitous, or are they only true of particular populations from/foraging in particular locations?

In your methods section, your field methods are good and descriptive but could include a bit more detail with regards to the potential for loggers to have impacted the gannets' behaviour/demographic parameters. Some would argue that total deployment weights as well as the weights of the birds (upon deployment and retrieval possibly) should be included. You also don't currently provide any methodology behind logger retrievals, including how many birds/loggers were recaptured and when this occurred (i.e., how long the deployment length was). I know that this is mentioned later within your results, but wonder whether it should be considered as more of a methodological point. I also wonder whether you should move your bloods methods to the Data Collection section, as I was surprised to read this section of text later on within your methods instead. Otherwise, perhaps you could rename your section heading methods so that they read “Biologging Data Collection” instead, or something similar.

I feel that Figure 1 is a conceptual diagram of your study methods, as opposed to the actual study and your specific hypotheses?

Please can you clarify the methods behind “confirming” TDR dives? Was this via visual inspection, as suggested in your Results?

I wonder whether it might be helpful to rearrange the order of your “Energetics from Accelerometry” section so that you first state what you are aiming to do with these methods, and then outline the steps that you took to achieve this goal.

I wonder whether the second paragraph of your “Statistical Analysis” section should feature earlier on as I'm not sure that it is really describing statistical analyses particularly. Perhaps this is also true of some of the following paragraph, i.e., the fish allometry etc.

When discussing sex differences in diving behaviour within your Results, perhaps considering including the percentage differences between some of the male and female metrics within the results would be helpful, rather than just the means of each sex.

I think that your table and figure headings could be more descriptive so that they are able to be easily interpreted as stand-alone items, without the remainder of the text being read. For example, you could include the species and colony that you are investigating.

I'm not sure whether I agree that there are not previous instances of the energetic cost of individual prey capture attempts being estimated in seabirds. Haven't seabird-mounted cameras

paired with accelerometry been used to do this? Or devices that record beak opening events/changes in oesophageal temperature? Maybe I'm wrong, but perhaps these are methods that could also be mentioned in your Introduction if trying to estimate the energetic cost of prey capture attempts is a key goal of this manuscript.

I think that your Discussion could generally do with another check through to ensure that the readability is as good as elsewhere in your manuscript and that it flows and covers all of the aspects that you want it to, in a way that flows and makes sense. For example, I'm not totally sure what the goal of the large second paragraph is at the moment as you discuss a number of different results in turn throughout. Additionally, I think that L413-20 in particular could be streamlined a little to increase their readability. I know what you're trying to say, but I think that they could benefit from a little more editing, including the mention of it being the sexes that have divergent diets within the final sentence of this paragraph. I've recommended some grammatical changes to L421-7 too, but also wonder whether you could tie this back to the results of this manuscript a bit more. The same is also true of the following paragraph (L428-34) and elsewhere within your Discussion.

Some of your in-text citations seem to be in a strange format and should be double checked throughout.

I've provided a marked-up document of the pdf (see Appendix A) with a few more small comments here and there, but otherwise, good job!

## Decision letter (RSOS-210520.R0)

We hope you are keeping well at this difficult and unusual time. We continue to value your support of the journal in these challenging circumstances. If Royal Society Open Science can assist you at all, please don't hesitate to let us know at the email address below.

Dear Dr Bennison

The Editors assigned to your paper RSOS-210520 "A bioenergetics approach to understanding sex differences in the foraging behaviour of a sexually monomorphic species" have now received comments from reviewers and would like you to revise the paper in accordance with the reviewer comments and any comments from the Editors. Please note this decision does not guarantee eventual acceptance.

We invite you to respond to the comments supplied below and revise your manuscript. Below the referees' and Editors' comments (where applicable) we provide additional requirements. Final acceptance of your manuscript is dependent on these requirements being met. We provide guidance below to help you prepare your revision.

We do not generally allow multiple rounds of revision so we urge you to make every effort to fully address all of the comments at this stage. If deemed necessary by the Editors, your manuscript will be sent back to one or more of the original reviewers for assessment. If the original reviewers are not available, we may invite new reviewers.

Please submit your revised manuscript and required files (see below) no later than 21 days from today's (ie 02-Sep-2021) date. Note: the ScholarOne system will 'lock' if submission of the revision is attempted 21 or more days after the deadline. If you do not think you will be able to meet this deadline please contact the editorial office immediately.

Please note article processing charges apply to papers accepted for publication in Royal Society Open Science (<https://royalsocietypublishing.org/rsos/charges>). Charges will also apply to papers transferred to the journal from other Royal Society Publishing journals, as well as papers submitted as part of our collaboration with the Royal Society of Chemistry (<https://royalsocietypublishing.org/rsos/chemistry>). Fee waivers are available but must be requested when you submit your revision (<https://royalsocietypublishing.org/rsos/waivers>).

Thank you for submitting your manuscript to Royal Society Open Science and we look forward to receiving your revision. If you have any questions at all, please do not hesitate to get in touch.

Kind regards,  
Royal Society Open Science Editorial Office  
Royal Society Open Science  
[openscience@royalsociety.org](mailto:openscience@royalsociety.org)

on behalf of Dr Agustina Gómez-Laich (Associate Editor) and Kevin Padian (Subject Editor)  
[openscience@royalsociety.org](mailto:openscience@royalsociety.org)

Associate Editor Comments to Author (Dr Agustina Gómez-Laich):

Associate Editor: 1

Comments to the Author:

Dear authors,

In this study, the authors used a bioenergetic approach to examine intersexual differences in the foraging behavior of a sexually monomorphic seabird; the Northern Gannet. To do this, they instrumented female and male breeding gannets with GPSs, accelerometers, and TDRs. Energy expenditure was estimated using dynamic body acceleration and afterward converted to kilojoules. Additionally, Stable Isotope Analyses was employed to study intersexual differences in diet and to estimate each sex's energy acquisition. The study's main finding is that sex differences in foraging behavior are mainly associated with dive rate and success. This study provides an important contribution to science, but the methods and discussion sections need to be improved. I feel authors should address some general and specific issues (see below) before the manuscript can be published.

#### General comments

- 1) Please present in a more explicit way the hypothesis you are testing. This would help to structure the manuscript. Additionally, it would greatly improve the manuscript if authors refer to the main questions and hypotheses/predictions along with the methodology, results, and discussion sections. For example, several sections of the discussion refer to the methodology employed to estimate energy expenditure. Even though this is an important aspect of the Ms, it is not one of the main objectives.
- 2) Several sections of the methodology need to be better explained (see below).
- 3) Results could be improved by incorporating more tables for example as Supplementary material.
- 4) The discussion could be greatly improved if authors focused more on debating their findings and how they contribute to the main hypothesis. Many paragraphs repeat information that was already mentioned in the results.

#### Specific comments

Keywords: accelerometry instead of accelerometry

Keywords: Isotope or isotope?

## Introduction

Lines 77-79. It would be interesting to explain how foraging at different locations may benefit females to restore their body condition after egg production.

Lines 79-81. Can you give an example of how sex-specific foraging strategies in sexually monomorphic species may be driven by intraspecific competition causing one sex to be displaced spatially or to forage in different niches?

Lines 76-86. In this second paragraph, the first and fourth sentences present very similar ideas.

Line 102. Please give examples of other direct methods.

Line 103. Can you briefly explain what each isotopic ratio allows us to know about prey consumption?

Line 107. Please add what this marginally heavier means.

Line 114-115. Than forage fish female specialist sounds awkward.

Line 119-125. I suggest rephrasing this last paragraph. First, mention the objectives and then the methodology you will use to reach them. Additionally, It would be interesting to be more explicit with the hypothesis you are testing (see general comments). It would also be interesting to present some predictions.

## Methodology

Line 140. Figure 1 does not show the conceptual diagram of the study. This figure shows a diagram of a part of the methodology.

Line 140. How many males, and how many females were instrumented? Did you instrument pairs? How much time were the devices left on the birds? This information is mentioned in the results instead of being in the methodology. Did birds that were instrumented continued breeding normally?

Line 141. This means that in some nests chicks were 21 days old and in other chicks were more than a month? Is the foraging behavior similar during both stages of the breeding season (3 vs 5 weeks old chicks)? Please incorporate information regarding this particular topic.

Please add the dimensions of each one of the loggers you deployed on the birds.

Line 152. How much blood was taken? From where was the blood sample taken?

Figure 1. I suggest including which were the defined behaviors.

Line 159-160. "further methods that develop the findings" sounds awkward. Please rephrase.

Line 162. Please explain more in detail how you analyze the acceleration data. To obtain a time-activity budget and estimate the energy expenditure during a foraging trip, not only the dives should be identified from the acc data. How did you recognize when birds were flying and floating? Equations to estimate energy expenditure from VeDBA may be activity-specific. For

example, the equation used to derive energy expenditure for flying and diving may be different. Was this taken into account? Please give more details about this particular subject. Additionally, please give more details about how the acceleration data was processed. Once you had the acceleration data, you calculated the average value for each of the axes using a running mean of 2 seconds? How did you calculate the pitch values from the acc data? What does the X, Z, and Y-axis mean? Please specify which is the heave, sway and surge.

Lines 172-175. It would be nice to see a figure of the bimodal distribution accelerometer-derived dives had as supplementary information.

Line 177. To do this first you had to obtain the time-activity budget of the birds, that is to say, how much time each bird expended on each activity. For this, the acceleration data such me labeled. How did you do this? Visually? Using some algorithm? Please give more details about this.

Line 179. Please explain how you calculated VeDBA. It is not clear if you calculated the VeDBA for each activity (flying, floating, diving) and once this had been done using a specific equation to convert this VeDBA value into kilojoules. Which allometric equations did you use? It would be worth incorporating this as supplementary information also.

Line 191. What does the individualized VeDBA to kJ equation mean?

Line 193. Couldn't you use the TDR information to determine when birds were on the surface?

Line 204. n=19 in 2017 and n=28 in 2018 should be placed after 47 birds.

Line 234. Here it says LMER but in the results it says GLM. Did you perform an LMER or a GLM? Please add which distribution was used and why.

Line 235. Please explain why the interaction between year and dive type was included in the model.

Line 239. In general, there seems to be some controversy about model averaging. If your top model has relatively good support (as compared to second-best models) some suggested it may be better to refrain from model averaging. Why did you choose to do model averaging? Please explain how you obtained the average. It would be interesting to incorporate a table with the best models, their AIC, deltaic, and weight as supplementary material.

Line 246. These sentences are not clear. It is not clear if you used trips as energetic units or you also considered some periods at the colony.

Line 247. So you calculated a foraging trip energy expenditure and a 24 hour period energy expenditure? Please clarify this aspect. Comparisons between females and males were performed for both time periods (foraging trip and 24-hour period)?

Line 254. Did you mean the total amount of food they needed to eat to get the energy they expended? Cant this be achieved by eating more than one combination of prey proportions?

Line 267-268. Please rephrase this sentence. It is not clear.

Results.

Line 282. Does this mean that from one individual you couldn't determine the sex from the blood sample?

Line 290. Please explain better how this average LMER was obtained. It would be nice to see in a table all the models that showed delta AIC values higher than 6.

Line 316. Why here you present a Chi-square and in Line 313 an F? How did you get these statistics? This is not mentioned in the methodology.

Figure 3. Please explain what each part of the boxplot means.

## Discussion

Line 385-387. This sentence is not clear. I would rather say that you focused on behaviors that imply movement. Certain behaviors do not imply movement and for that behaviors, VEDBA would not be useful.

Line 399-401. Energy expenditure can be affected by the medium in which an animal moves especially if the movement in different media involves different muscle groups.

Line 449. It would be nice to see a table showing how much energy each bird expended in the different behaviors that comprise the foraging trip. In this table, the time engaged in each behavior could also be included.

Line 470-471. Can you please more information and specific examples about how the bioenergetic approach presented in this study could contribute to future studies?

Associate Editor: 2

Comments to the Author:  
(There are no comments.)

Reviewer comments to Author:

Reviewer: 1

Comments to the Author(s)

I really enjoyed reading this manuscript! Well done. The introduction was great and flowed nicely, providing a background into sex-specific differences in foraging behaviour, its potential drivers (energy expenditure and diet), the methods used to investigate this and your study system. This set the manuscript up well.

Are you able to provide any further information regarding the “marginal” sex differences in weight observed in gannets, that you mention within your introduction? Are the other sex differences in gannets that you mention (foraging behaviour and diet) considered to ubiquitous, or are they only true of particular populations from/foraging in particular locations?

In your methods section, your field methods are good and descriptive but could include a bit more detail with regards to the potential for loggers to have impacted the gannets' behaviour/demographic parameters. Some would argue that total deployment weights as well as the weights of the birds (upon deployment and retrieval possibly) should be included. You also don't currently provide any methodology behind logger retrievals, including how many birds/loggers were recaptured and when this occurred (i.e., how long the deployment length was). I know that this is mentioned later within your results, but wonder whether it should be considered as more of a methodological point. I also wonder whether you should move your bloods methods to the Data Collection section, as I was surprised to read this section of text later

on within your methods instead. Otherwise, perhaps you could rename your section heading methods so that they read “Biologging Data Collection” instead, or something similar.

I feel that Figure 1 is a conceptual diagram of your study methods, as opposed to the actual study and your specific hypotheses?

Please can you clarify the methods behind “confirming” TDR dives? Was this via visual inspection, as suggested in your Results?

I wonder whether it might be helpful to rearrange the order of your “Energetics from Accelerometry” section so that you first state what you are aiming to do with these methods, and then outline the steps that you took to achieve this goal.

I wonder whether the second paragraph of your “Statistical Analysis” section should feature earlier on as I’m not sure that it is really describing statistical analyses particularly. Perhaps this is also true of some of the following paragraph, i.e., the fish allometry etc.

When discussing sex differences in diving behaviour within your Results, perhaps considering including the percentage differences between some of the male and female metrics within the results would be helpful, rather than just the means of each sex.

I think that your table and figure headings could be more descriptive so that they are able to be easily interpreted as stand-alone items, without the remainder of the text being read. For example, you could include the species and colony that you are investigating.

I’m not sure whether I agree that there are not previous instances of the energetic cost of individual prey capture attempts being estimated in seabirds. Haven’t seabird-mounted cameras paired with accelerometry been used to do this? Or devices that record beak opening events/changes in oesophageal temperature? Maybe I’m wrong, but perhaps these are methods that could also be mentioned in your Introduction if trying to estimate the energetic cost of prey capture attempts is a key goal of this manuscript.

I think that your Discussion could generally do with another check through to ensure that the readability is as good as elsewhere in your manuscript and that it flows and covers all of the aspects that you want it to, in a way that flows and makes sense. For example, I’m not totally sure what the goal of the large second paragraph is at the moment as you discuss a number of different results in turn throughout. Additionally, I think that L413-20 in particular could be streamlined a little to increase their readability. I know what you’re trying to say, but I think that they could benefit from a little more editing, including the mention of it being the sexes that have divergent diets within the final sentence of this paragraph. I’ve recommended some grammatical changes to L421-7 too, but also wonder whether you could tie this back to the results of this manuscript a bit more. The same is also true of the following paragraph (L428-34) and elsewhere within your Discussion.

Some of your in-text citations seem to be in a strange format and should be double checked throughout.

I’ve provided a marked-up document of the pdf with a few more small comments here and there, but otherwise, good job!

===PREPARING YOUR MANUSCRIPT===



Your revised paper should include the changes requested by the referees and Editors of your manuscript. You should provide two versions of this manuscript and both versions must be provided in an editable format:

one version identifying all the changes that have been made (for instance, in coloured highlight, in bold text, or tracked changes);

a 'clean' version of the new manuscript that incorporates the changes made, but does not highlight them. This version will be used for typesetting if your manuscript is accepted.

Please ensure that any equations included in the paper are editable text and not embedded images.

Please ensure that you include an acknowledgements' section before your reference list/bibliography. This should acknowledge anyone who assisted with your work, but does not qualify as an author per the guidelines at <https://royalsociety.org/journals/ethics-policies/openness/>.

While not essential, it will speed up the preparation of your manuscript proof if accepted if you format your references/bibliography in Vancouver style (please see <https://royalsociety.org/journals/authors/author-guidelines/#formatting>). You should include DOIs for as many of the references as possible.

If you have been asked to revise the written English in your submission as a condition of publication, you must do so, and you are expected to provide evidence that you have received language editing support. The journal would prefer that you use a professional language editing service and provide a certificate of editing, but a signed letter from a colleague who is a native speaker of English is acceptable. Note the journal has arranged a number of discounts for authors using professional language editing services (<https://royalsociety.org/journals/authors/benefits/language-editing/>).

===PREPARING YOUR REVISION IN SCHOLARONE===

To revise your manuscript, log into <https://mc.manuscriptcentral.com/rsos> and enter your Author Centre - this may be accessed by clicking on "Author" in the dark toolbar at the top of the page (just below the journal name). You will find your manuscript listed under "Manuscripts with Decisions". Under "Actions", click on "Create a Revision".

Attach your point-by-point response to referees and Editors at Step 1 'View and respond to decision letter'. This document should be uploaded in an editable file type (.doc or .docx are preferred). This is essential.

Please ensure that you include a summary of your paper at Step 2 'Type, Title, & Abstract'. This should be no more than 100 words to explain to a non-scientific audience the key findings of your research. This will be included in a weekly highlights email circulated by the Royal Society press office to national UK, international, and scientific news outlets to promote your work.

At Step 3 'File upload' you should include the following files:

-- Your revised manuscript in editable file format (.doc, .docx, or .tex preferred). You should upload two versions:

- 1) One version identifying all the changes that have been made (for instance, in coloured highlight, in bold text, or tracked changes);
- 2) A 'clean' version of the new manuscript that incorporates the changes made, but does not highlight them.

-- An individual file of each figure (EPS or print-quality PDF preferred [either format should be produced directly from original creation package], or original software format).

-- An editable file of each table (.doc, .docx, .xls, .xlsx, or .csv).

-- An editable file of all figure and table captions.

Note: you may upload the figure, table, and caption files in a single Zip folder.

-- Any electronic supplementary material (ESM).

-- If you are requesting a discretionary waiver for the article processing charge, the waiver form must be included at this step.

-- If you are providing image files for potential cover images, please upload these at this step, and inform the editorial office you have done so. You must hold the copyright to any image provided.

-- A copy of your point-by-point response to referees and Editors. This will expedite the preparation of your proof.

At Step 6 'Details & comments', you should review and respond to the queries on the electronic submission form. In particular, we would ask that you do the following:

-- Ensure that your data access statement meets the requirements at

<https://royalsociety.org/journals/authors/author-guidelines/#data>. You should ensure that you cite the dataset in your reference list. If you have deposited data etc in the Dryad repository, please include both the 'For publication' link and 'For review' link at this stage.

-- If you are requesting an article processing charge waiver, you must select the relevant waiver option (if requesting a discretionary waiver, the form should have been uploaded at Step 3 'File upload' above).

-- If you have uploaded ESM files, please ensure you follow the guidance at

<https://royalsociety.org/journals/authors/author-guidelines/#supplementary-material> to include a suitable title and informative caption. An example of appropriate titling and captioning may be found at [https://figshare.com/articles/Table\\_S2\\_from\\_Is\\_there\\_a\\_trade-off\\_between\\_peak\\_performance\\_and\\_performance\\_breadth\\_across\\_temperatures\\_for\\_aerobic\\_scope\\_in\\_teleost\\_fishes\\_/3843624](https://figshare.com/articles/Table_S2_from_Is_there_a_trade-off_between_peak_performance_and_performance_breadth_across_temperatures_for_aerobic_scope_in_teleost_fishes_/3843624).

At Step 7 'Review & submit', you must view the PDF proof of the manuscript before you will be able to submit the revision. Note: if any parts of the electronic submission form have not been completed, these will be noted by red message boxes.

## Author's Response to Decision Letter for (RSOS-210520.R0)

See Appendix B.

## Decision letter (RSOS-210520.R1)

We hope you are keeping well at this difficult and unusual time. We continue to value your support of the journal in these challenging circumstances. If Royal Society Open Science can assist you at all, please don't hesitate to let us know at the email address below.

Dear Dr Bennison

On behalf of the Editors, we are pleased to inform you that your Manuscript RSOS-210520.R1 "A bioenergetics approach to understanding sex differences in the foraging behaviour of a sexually monomorphic species" has been accepted for publication in Royal Society Open Science subject to minor revision in accordance with the referees' reports. Please find the referees' comments along with any feedback from the Editors below my signature.

We invite you to respond to the comments and revise your manuscript. Below the referees' and Editors' comments (where applicable) we provide additional requirements. Final acceptance of your manuscript is dependent on these requirements being met. We provide guidance below to help you prepare your revision.

Please submit your revised manuscript and required files (see below) no later than 7 days from today's (ie 14-Dec-2021) date. Note: the ScholarOne system will 'lock' if submission of the revision is attempted 7 or more days after the deadline. If you do not think you will be able to meet this deadline please contact the editorial office immediately.

Please note article processing charges apply to papers accepted for publication in Royal Society Open Science (<https://royalsocietypublishing.org/rsos/charges>). Charges will also apply to papers transferred to the journal from other Royal Society Publishing journals, as well as papers submitted as part of our collaboration with the Royal Society of Chemistry (<https://royalsocietypublishing.org/rsos/chemistry>). Fee waivers are available but must be requested when you submit your revision (<https://royalsocietypublishing.org/rsos/waivers>).

Thank you for submitting your manuscript to Royal Society Open Science and we look forward to receiving your revision. If you have any questions at all, please do not hesitate to get in touch.

Kind regards,  
Royal Society Open Science Editorial Office  
Royal Society Open Science  
[openscience@royalsociety.org](mailto:openscience@royalsociety.org)

on behalf of Dr Agustina Gómez-Laich (Associate Editor) and Kevin Padian (Subject Editor)  
[openscience@royalsociety.org](mailto:openscience@royalsociety.org)

Associate Editor Comments to Author (Dr Agustina Gómez-Laich):

Specific comments to authors.

Introduction.

Line 88. Please incorporate the Brown booby specific species name.

Lines 137-144. I realize in the previous version my suggestion was to first state the objectives and afterwards the technology employed. In the present version I suggest first mentioning the main objective and methodology employed and afterwards mention the specific objectives. For example:

In the present study, we used GPS, accelerometry, and SIA data to gain a better understanding of how gannets engage in foraging and how different demands upon the sexes may affect foraging strategies. Specifically, we explore sex differences in foraging of gannets in terms of diet, dive types, frequency of prey capture attempts, and the energetic cost of prey capture attempts. Additionally, we quantify the energetic requirements of each sex, taking into account energy expended during foraging and, using data from published studies, energetic demands of feeding offspring. Finally, we consider minimum dive success rates necessary for male and female gannets to meet their energy demands.

Lines 151-157. Hypothesis. The first one is fine however, the second and the third one are predictions not hypotheses. Please rephrase them.

## Methods

Line 174. Please revise the numbers, here the total number of instrumented birds is 14 and below is 13. Please state how many females and males were equipped each year.

Line 175. Please change for 52° 7' 37.92" N, 6° 35' 45.6" W

Line 181. Which was the depth threshold? 0.5 or 1 m? Or some devices were programmed with a 0.5 threshold and some with a 1 m threshold? Please clarify this aspect.

Line 189. Is a period missing after (52)? The following that starts with "Previous" sounds a bit awkward, please rephrase it.

Line 189. the "s" in gannets looks like a subscript letter.

Line 192. This is the first time a table of the Supplementary information is mentioned so I suggest considering this table as table S1 instead of table S5. Please check that all Supp. table numbers are correctly mentioned in the main document after they are renumbered.

Line 268. For example, this would be table S2 now.

Line 293-297. This sentence is too long and not clear. Please rephrase it.

Line 336. Please check Supplementary information Table numbers.

Line 368. It is not clear to me how you test for differences in diving rate between sexes using linear regression. Please clarify this aspect.

## Results.

Line 421. Please mention in the methods how you tested for differences in body mass between sexes.

Line 426. Why didn't you test for differences in dive duration between sexes?

Line 428. Why didn't you test for differences in dive + take off costs between sexes?

Line 461. In the methods, you mention that differences in the diving rate between sexes were tested by means of linear regression and here a GLM is mentioned. Please clarify this aspect.

Line 501. You can say KIV instead of "average energy intake (KIV)" since you have already defined what KIV stands for.

## Discussion

Line 586. Please eliminate "do" from "Females may have to do dive more".

Line 596. "gannets" can be eliminated here since it is clear you are talking about gannets.

## Reviewer comments to Author:

===PREPARING YOUR MANUSCRIPT===

Your revised paper should include the changes requested by the referees and Editors of your manuscript.

You should provide two versions of this manuscript and both versions must be provided in an editable format:

one version should clearly identify all the changes that have been made (for instance, in coloured highlight, in bold text, or tracked changes);

a 'clean' version of the new manuscript that incorporates the changes made, but does not highlight them. This version will be used for typesetting.

Please ensure that any equations included in the paper are editable text and not embedded images.

Please ensure that you include an acknowledgements' section before your reference list/bibliography. This should acknowledge anyone who assisted with your work, but does not

qualify as an author per the guidelines at <https://royalsociety.org/journals/ethics-policies/openness/>.

While not essential, it will speed up the preparation of your manuscript proof if you format your references/bibliography in Vancouver style (please see <https://royalsociety.org/journals/authors/author-guidelines/#formatting>). You should include DOIs for as many of the references as possible.

If you have been asked to revise the written English in your submission as a condition of publication, you must do so, and you are expected to provide evidence that you have received language editing support. The journal would prefer that you use a professional language editing service and provide a certificate of editing, but a signed letter from a colleague who is a proficient user of English is acceptable. Note the journal has arranged a number of discounts for authors using professional language editing services (<https://royalsociety.org/journals/authors/benefits/language-editing/>).

===PREPARING YOUR REVISION IN SCHOLARONE===

To revise your manuscript, log into <https://mc.manuscriptcentral.com/rsos> and enter your Author Centre - this may be accessed by clicking on "Author" in the dark toolbar at the top of the page (just below the journal name). You will find your manuscript listed under "Manuscripts with Decisions". Under "Actions", click on "Create a Revision".

Attach your point-by-point response to referees and Editors at the 'View and respond to decision letter' step. This document should be uploaded in an editable file type (.doc or .docx are preferred). This is essential, and your manuscript will be returned to you if you do not provide it.

Please ensure that you include a summary of your paper at the 'Type, Title, & Abstract' step. This should be no more than 100 words to explain to a non-scientific audience the key findings of your research. This will be included in a weekly highlights email circulated by the Royal Society press office to national UK, international, and scientific news outlets to promote your work. An effective summary can substantially increase the readership of your paper.

At the 'File upload' step you should include the following files:

-- Your revised manuscript in editable file format (.doc, .docx, or .tex preferred). You should upload two versions:

1) One version identifying all the changes that have been made (for instance, in coloured highlight, in bold text, or tracked changes);

2) A 'clean' version of the new manuscript that incorporates the changes made, but does not highlight them.

-- An individual file of each figure (EPS or print-quality PDF preferred [either format should be produced directly from original creation package], or original software format).

-- An editable file of each table (.doc, .docx, .xls, .xlsx, or .csv).

-- An editable file of all figure and table captions.

Note: you may upload the figure, table, and caption files in a single Zip folder.

-- Any electronic supplementary material (ESM).

-- If you are requesting a discretionary waiver for the article processing charge, the waiver form must be included at this step.

-- If you are providing image files for potential cover images, please upload these at this step, and inform the editorial office you have done so. You must hold the copyright to any image provided.

-- A copy of your point-by-point response to referees and Editors. This will expedite the preparation of your proof.

At the 'Details & comments' step, you should review and respond to the queries on the electronic submission form. In particular, we would ask that you do the following:

- Ensure that your data access statement meets the requirements at <https://royalsociety.org/journals/authors/author-guidelines/#data>. You should ensure that you cite the dataset in your reference list. If you have deposited data etc in the Dryad repository, please only include the 'For publication' link at this stage. You should remove the 'For review' link.
- If you are requesting an article processing charge waiver, you must select the relevant waiver option (if requesting a discretionary waiver, the form should have been uploaded, see 'File upload' above).
- If you have uploaded any electronic supplementary (ESM) files, please ensure you follow the guidance at <https://royalsociety.org/journals/authors/author-guidelines/#supplementary-material> to include a suitable title and informative caption. An example of appropriate titling and captioning may be found at [https://figshare.com/articles/Table\\_S2\\_from\\_Is\\_there\\_a\\_trade-off\\_between\\_peak\\_performance\\_and\\_performance\\_breadth\\_across\\_temperatures\\_for\\_aerobic\\_scope\\_in\\_teleost\\_fishes\\_/3843624](https://figshare.com/articles/Table_S2_from_Is_there_a_trade-off_between_peak_performance_and_performance_breadth_across_temperatures_for_aerobic_scope_in_teleost_fishes_/3843624).

At the 'Review & submit' step, you must view the PDF proof of the manuscript before you will be able to submit the revision. Note: if any parts of the electronic submission form have not been completed, these will be noted by red message boxes - you will need to resolve these errors before you can submit the revision.

## Author's Response to Decision Letter for (RSOS-210520.R1)

See Appendix C.

## Decision letter (RSOS-210520.R2)

We hope you are keeping well at this difficult and unusual time. We continue to value your support of the journal in these challenging circumstances. If Royal Society Open Science can assist you at all, please don't hesitate to let us know at the email address below.

Dear Dr Bennison,

I am pleased to inform you that your manuscript entitled "A bioenergetics approach to understanding sex differences in the foraging behaviour of a sexually monomorphic species" is now accepted for publication in Royal Society Open Science.

Please remember to make any data sets or code libraries 'live' prior to publication, and update any links as needed when you receive a proof to check - for instance, from a private 'for review' URL to a publicly accessible 'for publication' URL. It is good practice to also add data sets, code and other digital materials to your reference list.

Our payments team will be in touch shortly if you are required to pay a fee for the publication of the paper (if you have any queries regarding fees, please see <https://royalsocietypublishing.org/rsos/charges> or contact [authorfees@royalsociety.org](mailto:authorfees@royalsociety.org)).

The proof of your paper will be available for review using the Royal Society online proofing system and you will receive details of how to access this in the near future from our production office ([openscience\\_proofs@royalsociety.org](mailto:openscience_proofs@royalsociety.org)). We aim to maintain rapid times to publication after acceptance of your manuscript and we would ask you to please contact both the production office and editorial office if you are likely to be away from e-mail contact to minimise delays to publication. If you are going to be away, please nominate a co-author (if available) to manage the proofing process, and ensure they are copied into your email to the journal.

Please see the Royal Society Publishing guidance on how you may share your accepted author manuscript at <https://royalsociety.org/journals/ethics-policies/media-embargo/>. After publication, some additional ways to effectively promote your article can also be found here <https://royalsociety.org/blog/2020/07/promoting-your-latest-paper-and-tracking-your-results/>.

On behalf of the Editors of Royal Society Open Science, thank you for your support of the journal and we look forward to your continued contributions to Royal Society Open Science.

Kind regards,  
Royal Society Open Science Editorial Office  
Royal Society Open Science  
[openscience@royalsociety.org](mailto:openscience@royalsociety.org)

on behalf of Dr Agustina Gómez-Laich (Associate Editor) and Kevin Padian (Subject Editor)  
[openscience@royalsociety.org](mailto:openscience@royalsociety.org)

Follow Royal Society Publishing on Twitter: @RSocPublishing  
Follow Royal Society Publishing on Facebook:  
<https://www.facebook.com/RoyalSocietyPublishing.FanPage/>  
Read Royal Society Publishing's blog:  
<https://royalsociety.org/blog/blogsearchpage/?category=Publishing>

**Appendix A****ROYAL SOCIETY  
OPEN SCIENCE****A bioenergetics approach to understanding sex differences  
in the foraging behaviour of a sexually monomorphic  
species**

|                               |                                                                                                                                                                                                                                                                                                                                                                                                                                                                                                                                                                                             |
|-------------------------------|---------------------------------------------------------------------------------------------------------------------------------------------------------------------------------------------------------------------------------------------------------------------------------------------------------------------------------------------------------------------------------------------------------------------------------------------------------------------------------------------------------------------------------------------------------------------------------------------|
| Journal:                      | <i>Royal Society Open Science</i>                                                                                                                                                                                                                                                                                                                                                                                                                                                                                                                                                           |
| Manuscript ID                 | RSOS-210520                                                                                                                                                                                                                                                                                                                                                                                                                                                                                                                                                                                 |
| Article Type:                 | Research                                                                                                                                                                                                                                                                                                                                                                                                                                                                                                                                                                                    |
| Date Submitted by the Author: | 13-Apr-2021                                                                                                                                                                                                                                                                                                                                                                                                                                                                                                                                                                                 |
| Complete List of Authors:     | Bennison, Ashley; Galway-Mayo Institute of Technology, Earth & Environmental Sciences; University College Cork, School of Biological, Earth & Environmental Sciences; University College Cork, MaREI<br>Giménez, Joan; University College Cork, MaREI<br>Quinn, John; University College Cork, School of Biological, Earth, & Environmental Sciences<br>Jessopp, Mark; University College Cork National University of Ireland, MaREI Centre, Environmental Research Institute; University College Cork National University of Ireland, School of Biological, Earth & Environmental Sciences |
| Subject:                      | ecology < BIOLOGY, bioenergetics < CROSS-DISCIPLINARY SCIENCES                                                                                                                                                                                                                                                                                                                                                                                                                                                                                                                              |
| Keywords:                     | bioenergetics, sex differences, seabirds, movement ecology                                                                                                                                                                                                                                                                                                                                                                                                                                                                                                                                  |
| Subject Category:             | Organismal and Evolutionary Biology                                                                                                                                                                                                                                                                                                                                                                                                                                                                                                                                                         |
|                               |                                                                                                                                                                                                                                                                                                                                                                                                                                                                                                                                                                                             |

SCHOLARONE™  
Manuscripts



**Author-supplied statements**

Relevant information will appear here if provided.

***Ethics***

*Does your article include research that required ethical approval or permits?:*

Yes

*Statement (if applicable):*

All research was approved by the University College Cork Animal Ethics Committee and was conducted under licence from the Health Products Regulatory Authority, the National Parks and Wildlife Service, and the British Trust for Ornithology.

***Data***

*It is a condition of publication that data, code and materials supporting your paper are made publicly available. Does your paper present new data?:*

Yes

*Statement (if applicable):*

Data and scripts have been uploaded to Dryad and are available at:

<https://doi.org/10.5061/dryad.zs7h44j88>

A link for access to review the dataset is provided below:

<https://datadryad.org/stash/share/PlzjD8vxRQvP7RqRYlvZfd6j88Mc4s6bGnOEJfnon6Y>

***Conflict of interest***

I/We declare we have no competing interests

*Statement (if applicable):*

CUST\_STATE\_CONFLICT :No data available.

***Authors' contributions***

This paper has multiple authors and our individual contributions were as below

*Statement (if applicable):*

AB, MJ, and JQ conceptualised the project. AB and MJ undertook fieldwork to collect data. JG undertook preparation of isotopic samples and isotope modelling. AB undertook the remaining analysis. All authors contributed actively the writing of the manuscript and approve the final edit.

# A bioenergetics approach to understanding sex differences in the foraging behaviour of a sexually monomorphic species

Ashley Bennison<sup>1,2,3</sup>, Joan Giménez<sup>2</sup>, John L. Quinn<sup>3</sup>, Mark Jessopp<sup>2,3</sup>

1. Marine and Freshwater Research Centre, Galway-Mayo Institute of Technology, Galway, Ireland
2. Centre for Marine Renewable Energy, College of Science, Engineering and Food Science, University College Cork, Ireland
3. School of Biological, Earth & Environmental Sciences, College of Science, Engineering and Food Science, University College Cork, Ireland

Corresponding Author: [Ashley.bennison@gmit.ie](mailto:Ashley.bennison@gmit.ie)

## Data Accessibility

Data will be made available for access on the Dryad Open Access Repository once published.

## Acknowledgements

We are grateful to the Neale family for access to Great Saltee where this work was undertaken. AB was funded by the Irish Research Council Postgraduate Scholarship (Project ID: GOIPG/2016/503). All research was approved by the University College Cork Animal Ethics Committee and was conducted under licence from the Health Products Regulatory Authority, the National Parks and Wildlife Service, and the British Trust for Ornithology.

1  
2  
3     23    **Author Contributions**  
4

5     24    AB, MJ, and JQ conceptualised the project. AB and MJ undertook fieldwork to collect data. JG  
6  
7     25    undertook preparation of isotopic samples and isotope modelling. AB undertook the remaining  
8  
9     26    analysis. All authors contributed actively the writing of the manuscript and approve the final  
10  
11    27    edit.  
12  
13    28

14  
15    29    **Keywords**  
16

17    30    Northern gannet, Isotope ecology, movement ecology, bioenergetics, acclerometry  
18  
19  
20    31  
21  
22    32  
23  
24  
25    33  
26  
27    34  
28  
29  
30    35  
31  
32    36  
33  
34  
35    37  
36  
37    38  
38  
39  
40    39  
41  
42    40  
43  
44  
45    41  
46  
47    42  
48  
49  
50    43  
51  
52    44  
53  
54  
55    45  
56  
57  
58  
59  
60

1  
2  
3 46  
4  
56 47 **Abstract**

8 48 Many animals show sexually divergent foraging behaviours reflecting different physiological  
9  
10 49 constraints or energetic needs. We used a bioenergetics approach to examine sex differences in  
11  
12 50 foraging behaviour of the sexually monomorphic northern gannet. We used the relationship  
13  
14 51 between dynamic body acceleration and energy expenditure to investigate  energetic cost of prey  
15  
16 52 capture attempts (plunge dives). Fourteen gannets were tracked using GPS, TDR, and  
17  
18 53 accelerometers. All plunge dives in a foraging trip represented <4% of total energy expenditure,  
19  
20 54 with no significant sex differences in expenditure. Despite females undertaking significantly more  
21  
22 55 dives than males, the low energetic cost resulted in no sex differences in overall energy  
23  
24 56 expenditure across a foraging trip. Bayesian stable isotope mixing models based on blood  
25  
26 57 samples highlighted sex differences in diet, however, calorific intake from successful prey capture  
27  
28 58 was estimated to be similar between sexes. Females experienced 9.6% higher energy demands,  
29  
30 59 due to unequal chick provisioning. Estimates show a minimum of 21% of dives have to be  
31  
32 60 successful for females to meet their daily energy requirements, and 29% for males. Our analyses  
33  
34 61 suggest northern gannets show sex differences in foraging behaviour primarily related to dive  
35  
36  
37  
38  
39  
40  
41  
42  
43  
44  
45  
46  
47  
48  
49  
50  
51  
52  
53  
54  
55  
56  
57  
58  
59  
60 62 rate and success rather than the energetic cost of foraging or energetic content of prey.

## 63 Introduction

64 Many animals show sex foraging differences, though it is often difficult to explore the  
65 mechanisms behind these differences - particularly in free ranging predators. Sex differences in  
66 foraging are often pronounced in sexually dimorphic species (1, 2). These differences may be due  
67 to competitive exclusion (3), or where different sexes may have access to different foraging areas  
68 due to their size (3, 4) or foraging habitat preference (5). Divergent sexual behaviours may also  
69 represent differences in nutrient requirements or prey preferences (6, 7), levels of parental care  
70 (8), or in the energetic demands of locomotion (9, 10). Differences can also arise because a  
71 dominant sex will outcompete or displace the other, resulting in sexual segregation (11, 12),  
72 niche expansion and reduced intraspecific competition (13).  ant petrels, *Macronectes*  
73 *giganteus*, where females weigh 80% the mass of males, show spatially segregated foraging areas  
74 (14), a pattern that holds true across a wide variety of taxa (15-18). Although sex differences in  
75 foraging tend to be less obvious in sexually monomorphic species, they still occur (19).

76 In monomorphic species, sex-specific foraging behaviour can be driven by differing energy  
77 requirements between the sexes (20). For example, Barau's petrel  monomorphic seabird  
78 where males and females forage in different locations early in the breeding season  females  
79 must restore body condition after egg production (20). There is also evidence to suggest that sex-  
80 specific foraging strategies in sexually monomorphic species may be driven by intraspecific  
81 competition causing one sex to be displaced spatially or to forage in different niches (21).  
82 Differing energy budgets and demands between the sexes may also drive the specialisation of  
83 prey targeting or foraging range (22). Foraging theory states that animals attempt to intake food  
84 in the most optimal manner possible (23-25) to ensure that net energy gain exceeds gross energy  
85 expenditure. However, accurately measuring energy intake and expenditure remains a challenge,  
86 especially in free-ranging animals (26, 27).

87 Measuring energetic expenditure has previously involved the use of double labelled water (DLW),  
88 respirometry chambers, or heart rate loggers (28). Though heart loggers can be used to  
89 investigate behaviour-specific energy costs (29) and respirometers can provide resting metabolic  
90 rates and calibration for other field measurements (30), these techniques can be invasive. In

1  
2  
3 91 recent years, accelerometry studies on free-ranging individuals have explored energetic  
4  
5 92 expenditure at a much finer scale and over longer time periods (31). These studies can use  
6  
7 93 measures of dynamic body acceleration (DBA) as a proxy for energy expenditure due to a strong  
8  
9 94 correlation with the volume of oxygen consumed by muscles ( $VO_2$ ) (32-34). However, developing  
10  
11 95 an understanding of how accelerometry signals relate to energy use and the corresponding  
12  
13 96 energy budgets of an individual animal requires knowledge of diet and energetic intake.

14  
15 97 Net energy intake is determined by the energy gained from successful foraging against energy  
16  
17 98 expended in metabolism through activities such as locomotion. Quantifying energy gained  
18  
19 99 through diet in free-ranging animals can be difficult without invasive techniques such as stomach  
20  
21 100 content analysis (35) or direct observation of prey capture (36). However, Stable Isotope Analysis  
22  
23 101 (SIA) is a minimally invasive technique that can provide diet information and, in seabird studies,  
24  
25 102 is known to correlate well with other more direct methods (37-39). Isotopic ratios of  $^{12}C/^{13}C$  and  
26  
27 103  $^{14}N/^{15}N$  can be used to infer prey species consumed by an individual (40). Using SIA to predict  
28  
29 104 predator diet can therefore provide insight into the energetics of foraging.

30  
31 105 The northern gannet (*Morus bassanus*), hereafter gannet, is sexually monomorphic with no  
32  
33 106 significant difference between males and females in length of tarsus, bill, or wing in breeding  
34  
35 107 adults (41, 42). While females are marginally heavier than males, weight alone cannot be used to  
36  
37 108 sex individuals (43). Despite the lack of overt sexual dimorphism, the species shows strong  
38  
39 109 sexually divergent foraging strategies. Female gannets are more selective in choosing foraging  
40  
41 110 grounds (44) and undertake longer trips, further offshore than males, a pattern that is thought  
42  
43 111 to arise from habitat segregation (45). From a dietary perspective, male gannets consume higher  
44  
45 112 proportions of fisheries discards than females, a division thought to derive from the competitive  
46  
47 113 exclusion of female gannets from vessels (46) and is a distinction only present in breeding adults  
48  
49 114 (42). Females which specialise on fisheries discards travel shorter distances than forage fish  
50  
51 115 female specialists, however this distinction is not apparent among males (47). At present, there  
52  
53 116 is no clear evidence for whether sexes target different sized prey in gannets. A lack of strong  
54  
55 117 sexual dimorphism in gannets suggests that sex differences in foraging strategies and diet may  
56  
57 118 derive from different energetic demands between the sexes, a previously untested hypothesis.

1  
2  
3 119 Here we used GPS, accelerometry, and SIA data to gain a better understanding of how gannets  
4  
5 120 engage in foraging and how different demands upon the sexes may affect foraging strategies.  
6

7  
8 121  this study, we explore sex differences in foraging in terms of diet, dive types, frequency of prey  
9  
10 122 capture attempts, and the energetic cost of prey capture attempts. We quantify the energetic  
11  
12 123 requirements of each sex, taking into account energy expended during foraging and, using data  
13  
14 124 from published studies, energetic demands of feeding offspring. Finally, we consider minimum  
15  
16 125 dive success rates necessary for males and females to meet their energy demands.  
17

18 126

19  
20  
21 127

22  
23  
24  
25 128

26  
27  
28 129

29  
30  
31 130

32  
33  
34  
35 131

36  
37  
38 132

39  
40  
41 133

42  
43  
44  
45 134

46  
47  
48  
49 135

50  
51  
52 136

53  
54  
55 137

## 138 **Methods**

### 139 ***Data Collection***

140 A conceptual diagram of our study is presented in Figure 1. Breeding adult gannets (n=8 in 2017,  
141 n=6 in 2018) attending 3-5 week-old chicks were tracked from Great Saltee, south-east Ireland  
142 (52° 7' 37.92", -6° 35' 45.6"). Birds were caught using an 8-10m pole with a metal crook, weighed,  
143 and equipped with a combination of dataloggers. GPS loggers (i-gotU GT-120, Mobile Action  
144 Technology Inc., Taipei, Taiwan, 14g) recorded locations every 3 minutes; time depth recorders  
145 (TDR, CEFAS G5, 2.5g) recorded depth at 4Hz after exceeding a 0.5 or 1m depth threshold; tri-  
146 axial accelerometers (Gulf Coast Data Concepts X16-mini, 17g) recorded *g*-forces ( $1g =$   
147  $9.807\text{m/sec}^2$ ) at 50Hz. GPS and TDR loggers were attached ventrally to 2-3 central tail feathers  
148 using strips of waterproof Tesa tape. Accelerometers were attached to 10-15 mantle feathers  
149 between the wings. Three birds in 2017 and six birds in 2018 were equipped with GPS, TDR, and  
150 accelerometers, while the remaining birds were equipped with only GPS and accelerometers.  
151 Total instrument mass was <2% of body mass, and positioned to minimise impact on gannet  
152 movement, both aerodynamic and hydrodynamic (48). A small volume of blood was sampled for  
153 stable isotope analysis (see below) and 2-3 breast feathers were plucked for genetic sexing  
154 following the method outlined by Griffiths, Double (49).



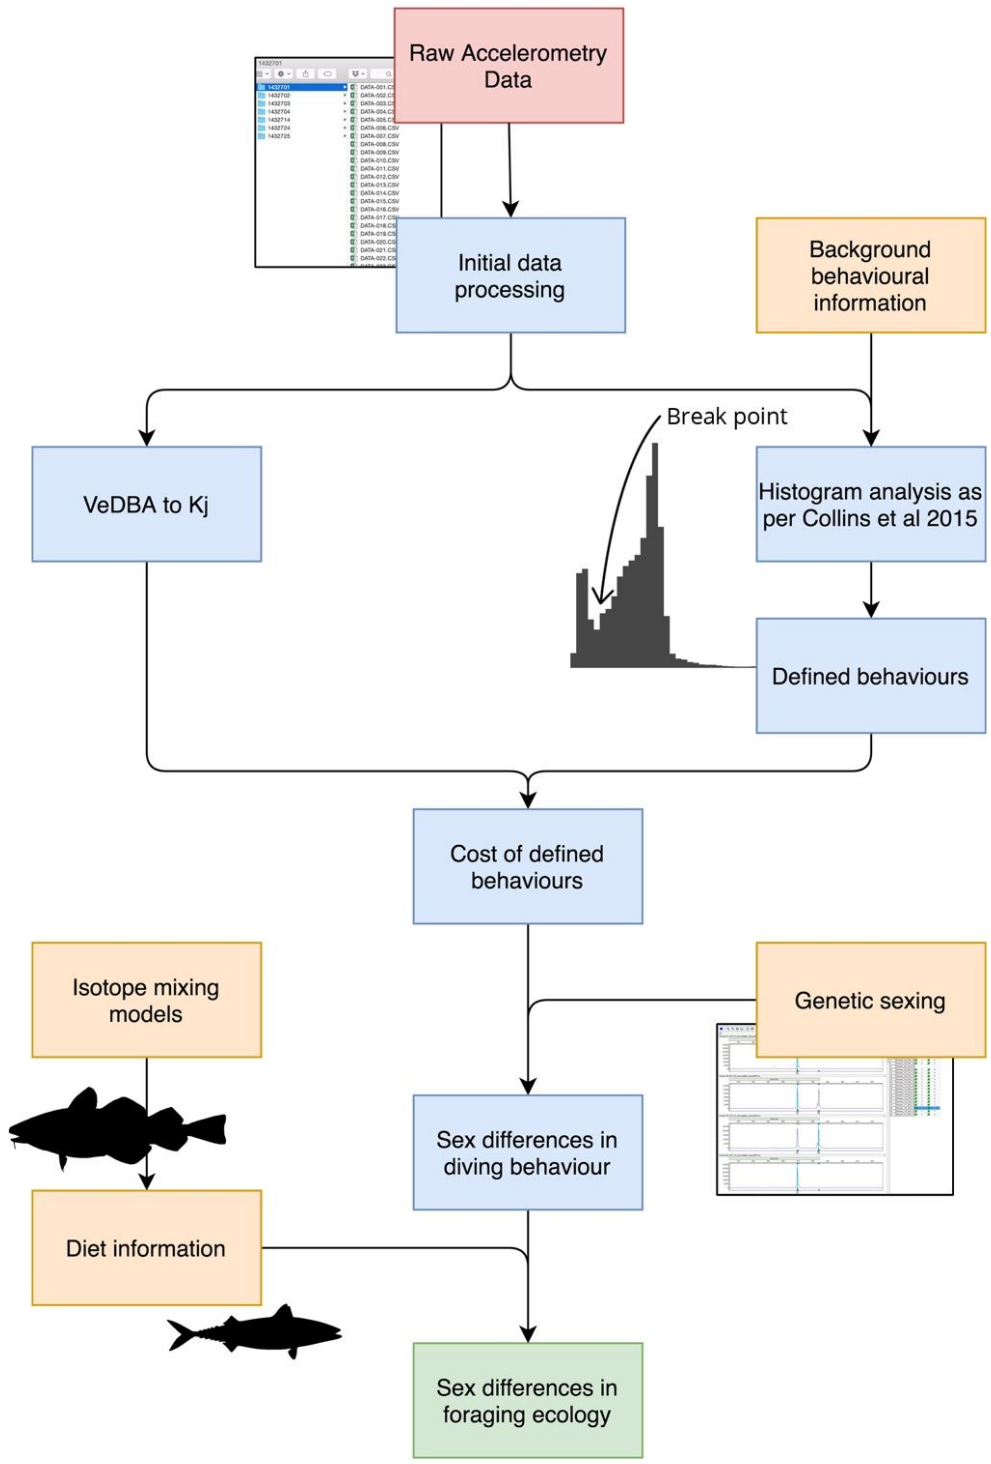

155

156 **Figure 1.** Schematic of methodology for data processing and the steps required to explore the  
 157 sex differences in the foraging of northern gannets. The process starts at top with the red box  
 158 labelled “raw accelerometry data” and ends with the green box “Sex differences in foraging

1  
2  
3 159 ecology.” Blue boxes represent the methodology for analysing data and orange boxes represent  
4  
5 160 further methods that develop the findings.  
6

### 7 161 ***Data processing and dive behaviour definition***

8  
9  
10 162 Behaviour classification from accelerometry data used a thresholding approach. Thresholds were  
11  
12 163 determined using protocols and guidance set out by Collins, Green (50) and Shepard, Wilson (51).  
13  
14 164 Diving events occurred when average acceleration (running average of 2 seconds) in the X-axis  
15  
16 165 was  $<0g$  and standard deviation (SD) in the mean X-axis was  $>1.4g$ . The end of a dive was defined  
17  
18 166 by a 1-second lagged maximum of pitch change within a 60 second period from the start of a  
19  
20 167 dive. Take-off events were defined with a threshold where, following a dive, the SD of the Z-axis  
21  
22 168 was  $>1.8g$  and the SD of the X-axis was  $>1g$ . Take-off events were considered to have ended and  
23  
24 169 returned to normal flight when the SD of the Z-axis resolved to  $<1.4g$  and the SD of the X-axis  
25  
26 170 was  $<1.4g$ .  subset of birds (n=9) tagged with both TDRs and accelerometers were used to  
27  
28 171 validate accelerometer-derived dive events by visually comparing timestamps to TDR confirmed  
29  
30 172 dives. Accelerometer-derived dives had a bimodal distribution and were split into plunge dives  
31  
32 173 and pursuit dives based on a distinct break within the frequency distribution at 5 seconds; plunge  
33  
34 174 dives are dives followed by an almost immediate rise to the surface, whilst a pursuit dive is  
35  
36 175 characterised by sustained chase of prey underwater.

### 36 176 ***Energetics from Accelerometry***

37  
38  
39 177 Dynamic body acceleration (DBA) is a relative metric that can be used as a proxy for energetic  
40  
41 178 expenditure from animal movement (52), and can be used to develop highly accurate activity  
42  
43 179 budgets (53). We used Vectorial DBA (VeDBA) to account for any variation in tag alignment (54).  
44  
45 180 We converted VeDBA into kilojoules (kJ) using published data and allometric equations (55). The  
46  
47 181 relationship between energy expenditure (kJ) and VeDBA is linear amongst a variety of animal  
48  
49 182 taxa, including mammals, reptiles, and birds (26, 33, 56), with slope  $k$ . Using the process outlined  
50  
51 183 in Figure 2, it is possible to produce estimates of kilojoules expended in movement for given  
52  
53 184 periods or behaviours. The process assumes that energy expended in movement is equal to an  
54  
55 185 animal's Field Metabolic Rate (FMR) minus Resting Metabolic Rate (RMR) for any given period.  
56  
57 186 Totalled 24-hour VeDBA is therefore equivalent to kJ from FMR-RMR, assuming where VeDBA =

187 0, kJ = 0. Simple algebra can then produce a formula for kJ of any VeDBA score over any time  
 188 period. Here, we used FMR estimates for Northern gannets provided by the Shiny App by Dunn,  
 189 White (57), corrected for individual bird weight and colony latitude (52°N), and RMR estimates  
 190 provided by allometric equations from Schmidt-Nielsen and Knut (55) to produce individualised  
 191 VeDBA to kJ equations. This method aims to produce whole sum approaches to energy  
 192 expenditure; at present it is not possible to effectively account for periods of rest on water where  
 193 sea swell may predict energy via acceleration and we assume that all acceleration is from animal  
 194 movement.

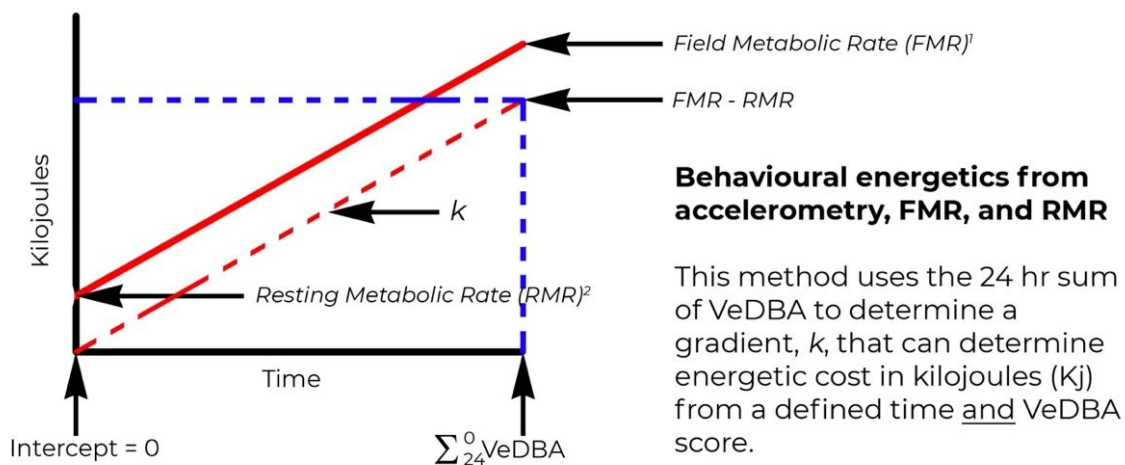

**For Kilojoules in seconds from VeDBA:**

$$\sum_{24}^0 \text{VeDBA} = \text{FMR} - \text{RMR} \rightarrow \text{Kj} \cdot \text{n}^{-1} = k \left( \frac{\sum_{\text{n}}^0 \text{VeDBA}}{\text{n}} \right)$$

$$\rightarrow \text{Kj} \cdot \text{s}^{-1} = k \left( \frac{\sum_{86400}^0 \text{VeDBA}}{86400} \right)$$

Sources:

1) FMR from Dunn et al 2018

2) RMR from Schmidt Nielsen & Knutt 1984

196

197 **Figure 2.** Conceptual diagram demonstrating how to extract the kilojoule values of any given  
 198 specific behaviour or time period within an accelerometry dataset for energy consumed only by  
 199 movement.

200

201

202

### 203 ***Isotopic Analysis for Diet Composition***

204 Blood samples were taken from 47 birds, including the accelerometer-equipped birds, (n=19 in  
205 2017 and n=28 in 2018) and used to construct a population model of dietary intake from isotope  
206 analysis. Blood samples were taken from the tarsus during tag deployment and centrifuged for  
207 10 minutes to separate red blood cells (RBC) from plasma. While RBC therefore represent diet  
208 prior to the deployment, preliminary sampling showed that isotopic signatures do not differ  
209 significantly between blood samples collected on deployment and recovery of devices  
210 approximately 1 week apart (unpublished data). Stable Isotope Analyses were performed at  
211 Elemtex UK (Stable Isotope and & Elemental Analysis Expertise), using a Thermoquest EA1110  
212 Elemental Analyser linked to a Sercon 2020 stable isotope ratio mass spectrometer running in  
213 continuous flow mode. Accuracy and precision were monitored through laboratory internal  
214 standards and an in-house comparison standard nested within samples.

215 Prey stable isotope values were obtained from a published dataset of Celtic Sea fish samples (58).  
216 These authors conducted stable isotope analysis of samples without lipid extraction. Then, the  
217  $\delta^{13}\text{C}$  data included in the published data set are not corrected for differences in lipid content, but  
218 the % C and N data was used to make the required corrections following Logan, Jardine (59). As  
219 recommended by Phillips, Inger (60), a reduced prey dataset was used and included only those  
220 species previously recorded in more than 3% of the diet for Great Saltee gannets (61). These  
221 species can be seen in Table S1 and 3.

222 Using Bayesian isotopic mixed models, it was possible to compare blood values to reference prey  
223 values to reconstruct diet of gannets. The model was run on “long” settings (chains = 3, length =  
224 300000, burn-in = 2000000, thinning = 100), using average diet-to-tissue discrimination factors  
225 ( $2.25 \pm 0.61$  ‰ for  $\delta^{15}\text{N}$  and  $0.24 \pm 0.79$  ‰ for  $\delta^{13}\text{C}$ ) from various studies of piscivorous birds (62-  
226 65). Model convergence was assessed with the Gelman-Rubin diagnostic (66). Sex-based diet  
227 estimates were obtained through Bayesian mixing models using the R package ‘MixSIAR’ (67).  
228 We fit several models of diet with fixed and random effects as covariates, and evaluated the  
229 relative support for each model using LOO (leave-one-out cross-validation) weights (68). Model

1  
2  
3 230 outputs were then used to construct prey proportions in the diet of males and females in 2017  
4  
5 231 and 2018.

6  
7  
8 232 ***Statistical analysis***

9  
10 233 To explore sex differences in the overall cost of prey capture attempts (dive and subsequent take-  
11  
12 234 off), a linear mixed effect regression (LMER) was used to test for sex differences in dive and take-  
13  
14 235 off characteristics. Factors included year, sex, weight, dive type, and the interaction between sex  
15  
16 236 and dive type to predict kilojoules expended. Individual was included as a random effect to  
17  
18 237 account for repeated measures of the same individual. To select the most parsimonious model,  
19  
20 238 the dredge function from the 'MuMin' package was used (69). Any models within 6 AIC values  
21  
22 239 were kept and model averaging undertaken (70).

23  
24 240 We used the relationship between VeDBA and kJ shown in Fig. 2 to estimate total energetic  
25  
26 241 *expenditure* for an individual bird from the time it left the colony, to the point of recapture.  
27  
28 242 Gannet trips may range from one to several days and so this whole sum approach allowed our  
29  
30 243 predictions to account for a full range of behaviours, from in colony, transiting, and foraging. As  
31  
32 244 gannet foraging trips may last several days, they incur increasing energetic costs during a foraging  
33  
34 245 trip such as feeding chicks upon return, we have included this in the analysis by considering  
35  
36 246 energetic differences from a whole sum approach and use gannet trips as the energetic unit. We  
37  
38 247 also consider individual energy expenditure per 24-hour period. We then calculated energetic  
39  
40 248 *demands* by adding to this value the energetic demand of raising a four week old chick of 1397.14  
41  
42 249 kJ/day (Montevecchi, Ricklefs (71), with females contributing 60% of this cost due to unequal  
43  
44 250 chick feeding in gannets (71, 72). Though it would be most appropriate to have information on  
45  
46 251 feeding rates of chicks in this study, we do not have this information and instead consider the  
47  
48 252 overall energy requirements of chicks which act as a proxy to feeding rates. This produced a value  
49  
50 253 of Total Energetic Demand (TED) for each gannet for the time it was tracked. Using sex-based SIA  
51  
52 254 model outputs, we predicted the proportion of prey species in the diet of male and female  
53  
54 255 gannets.

55  
56 256 We assumed the sizes of individual prey species were similar to those in Lewis, Sherratt (61), a  
57  
58 257 study from the same colony that did not identify any difference in the size of fish caught between  
59  
60

1  
2  
3 258 the sexes. The size and mass of the fish were then used to calculate the kJ value of each fish  
4  
5 259 species (using allometric equations referenced by Lewis, Sherratt (61) and assuming a 76.1%  
6  
7 260 assimilation efficiency following Cooper (73), See Table S1). For each sex-specific diet, the energy  
8  
9 261 content (kJ) of each fish was multiplied by the proportions of species in the diet and these  
10  
11 262 proportional values were summed to provide an average kJ intake value (KIV) for a successful  
12  
13 263 dive (a dive resulting in prey capture) for each individual gannet, assuming that successful prey  
14  
15 264 capture results in capture of one prey item. A Mann-Whitney-Wilcoxon test was used to test for  
16  
17 265 differences in KIV between sexes. For each gannet, TED was divided by KIV to determine how  
18  
19 266 many successful dives were required to maintain body condition, forage, and provision for a  
20  
21 267 chick. This number was then used as a proportion of dives recorded to derive realistic individual  
22  
23 268 minimum prey capture rates.

24 269

25  
26 27027  
28  
29 27130  
31 27232  
33  
34 27335  
36 27437  
38  
39 27540  
41 27642  
43  
44 27745  
46  
47 27848  
49  
50 27951  
52  
53  
54 280

## 281 Results

282 Of the 14 gannets tracked, five were female, eight were male, and one was of unknown sex. The  
283 individual of unknown sex was not included in analysis of sex differences. Male gannets were on  
284 average lighter than females; male weight was  $2.70\text{kg} \pm 0.19$  with females weighing  $2.99\text{kg} \pm 0.15$   
285 (Wilcoxon test:  $W=35.5$ ,  $r=0.88$ ,  $p=0.025$ ).

### 286 Sex differences in dive behaviour

287 1046 visually validated dives and subsequent take-off events were detected. 24% of dives were  
288 pursuit dives with females having a slight tendency towards increased pursuit dives compared to  
289 males. Combined cost of a single prey capture attempt (dive + take-off) in females was  $2.17$   
290  $\pm 0.73\text{kJ}$  while for males it was  $1.97 \pm 0.92\text{kJ}$ . An averaged LMER indicated a significant effect of  
291 dive type and year on energy expenditure associated with dives while sex was retained as a non-  
292 significant factor (Table 1). The estimates for cost of all prey capture attempts represent  $< 4\%$  of  
293 the daily total energy expenditure for each individual. Accounting for unequal provisioning of the  
294 chick, and the cost of foraging, daily energetic demands were  $9.6\%$  higher for females than males  
295 (female TED =  $4601\text{kJ} \pm 121.60$ ; male TED =  $4207\text{kJ} \pm 278.37$ , Wilcoxon test:  $W=34$ ,  $p<0.05$ , total  
296 number of female days:  $14.84$ , total number of male days:  $31.88$ ).

**Table 1.** Conditional model summary from the averaged mixed effect linear regression used to predict kilojoules (kJ) expended during a prey capture attempt. Input variables were year (2017 and 2018), sex (male and female), dive type (pursuit or plunge), and weight. The interaction between sex and dive type was also included. Dive type (plunge) and sex (Female) were absorbed into the intercept.

| <i>Dive energetics model</i> | <i>Coefficient</i> | <i>Std. Error</i> | <i>Adjusted SE</i> | <i>Z value</i> | <i>P value</i> |
|------------------------------|--------------------|-------------------|--------------------|----------------|----------------|
| <i>Intercept</i>             | -1976.374          | 794.301           | 795.059            | 2.486          | 0.01293        |
| <i>Type(Pursuit)</i>         | 0.6008             | 0.0480            | 0.0481             | 12.480         | <0.001         |
| <i>Year</i>                  | 1.0327             | 0.330             | 0.331              | 3.117          | <0.01          |
| <i>Weight</i>                | 0.1837             | 0.856             | 0.857              | 0.214          | 0.8302         |
| <i>Sex(Male)</i>             | -0.0895            | 0.411             | 0.411              | 0.217          | 0.8278         |

310

311

Females undertook significantly more dives per day than males (25.9 and 17.3 respectively, GLM  $F_{13}=8.63$ ,  $p<0.01$ ). However, because the cost of individual prey capture attempts is so low, a linear mixed effect regression predicting the energy expenditure (kJ) per day for each individual from sex and year, with ID as a random effect, found no significant effect of sex on daily energy expenditure (LMER  $\text{Chi}^2_{38} = 0.0004$ ,  $p = 0.98$ )

317

### 318 *Isotopic analysis*

319 The isotope mixing model predicted that the most consumed prey species were Atlantic mackerel  
 320 (*Scomber scombrus*) (27.83 %  $\pm 4.34$ ) and European sprat (*Sprattus sprattus*) (19.16%  $\pm 2.06$ )  
 321 followed by Lesser sandeel (*Ammodytes marinus*) (11.47 %  $\pm 0.99$ ) and Atlantic herring (*Clupea*  
 322 *harengus*) (11.26 %  $\pm 1.46$ ). The remaining species included in the models were each predicted to



323 contribute less than 8% to the overall diet. Seven different models were tested (Table 2) and the  
 324 best model included *Year* as a covariate (Model weight: 76.8 %, Model 4). The second-best model  
 325 included *Sex* and *Year* as variables with a relative weight of 23.1%, and was used to predict sex-  
 326 specific diets in each study year. There was no support for a model using individual ID only. Diet  
 327 between the sexes was similar in both years (Table 3), though mackerel made a higher  
 328 contribution to male diet (difference of 3.4% in 2017 and 4.3% in 2018). In 2018 the predominant  
 329 species consumed was mackerel (68.7% and 64.4% of diet for males and females respectively).

330

331 **Table 2.** Bayesian mixed effect model outputs to determine predictors of diet. The best model  
 332 lent support for a Year only model, however the second-best model was Sex +Year with a model  
 333 weight of 23.1%. This model was used to predict diet of the sexes. Leave One Out cross validation  
 334 Information Criteria (LOOic) were used to assessed model suitability.

| <i>Model</i> | <i>Variables</i> | <i>LOOic</i> | <i>Standard error LOOic</i> | <i>Delta LOOic</i> | <i>Standard error delta LOOic</i> | <i>weight</i> |
|--------------|------------------|--------------|-----------------------------|--------------------|-----------------------------------|---------------|
| <b>4</b>     | Year             | 87.5         | 11.8                        | 0                  | NA                                | 0.768         |
| <b>6</b>     | Sex + Year       | 89.9         | 11.6                        | 2.4                | 3                                 | 0.231         |
| <b>5</b>     | Year (by ID)     | 106.8        | 8.6                         | 19.3               | 6.4                               | 0             |
| <b>2</b>     | Sex              | 109.7        | 10.9                        | 22.2               | 6                                 | 0             |
| <b>1</b>     | Null             | 110.7        | 11                          | 23.2               | 5.5                               | 0             |
| <b>7</b>     | ID               | 139.2        | 10                          | 51.7               | 9.5                               | 0             |
| <b>3</b>     | Sex (by ID)      | 140.4        | 9.9                         | 52.9               | 9.9                               | 0             |

335

336

337

338

339

340

341

342 **Table 3.** The diet composition (%) of males and females in 2017 and 2018 as predicted by  
 343 Bayesian mixed effects modelling as reported in Table 2.

| <i>Species Name</i>            | <b>Common Name</b> | <b>2017</b>       |                 | <b>2018</b>       |                 |
|--------------------------------|--------------------|-------------------|-----------------|-------------------|-----------------|
|                                |                    | <b>Female (%)</b> | <b>Male (%)</b> | <b>Female (%)</b> | <b>Male (%)</b> |
| <i>Ammodytes spp.</i>          | Sandeels           | 13.3              | 13              | 4.5               | 4.5             |
| <i>Callionymus spp.</i>        | Dragonet           | 4.4               | 5.5             | 5.8               | 7.7             |
| <i>Chelidonichthys cuculus</i> | Red Gurnard        | 3.8               | 4.9             | 2.2               | 3               |
| <i>Clupea harengus</i>         | Atlantic Herring   | 6                 | 6.9             | 2.8               | 3.4             |
| <i>Merlangius merlangus</i>    | Whiting            | 6.4               | 8.3             | 1.6               | 2.2             |
| <i>Merluccius merluccius</i>   | Hake               | 6                 | 6.9             | 4.2               | 4.6             |
| <i>Pleuronectes platessa</i>   | Plaice             | 2.5               | 3               | 2.4               | 3.3             |
| <i>Scomber scombrus</i>        | Mackerel           | 37.3              | 33.9            | 68.7              | 64.4            |
| <i>Sprattus sprattus</i>       | Sprat              | 15                | 12.1            | 5.8               | 4.8             |
| <i>Trisopterus esmarkii</i>    | Norway Pout        | 5.1               | 5.6             | 2                 | 2.2             |

344

345 Applying average energy content of prey in proportion to its occurrence in the diet, a successful  
 346 dive was estimated to have an average energy intake (KIV) of 1006 kJ for females, and 1005 kJ  
 347 for males in 2017. In 2018, this figure rose with changing diet to 1563 kJ for females and 1553 kJ  
 348 for males.

349 Based on the number of dives performed and average energy content of prey in proportion to  
 350 their occurrence in sex-specific diets, female minimum feeding success rate was calculated as  
 351 21.21%  $\pm$ 8.42, whilst the male rate was 29.22%  $\pm$ 15.10 (Fig. 4.3). A summary of all results  
 352 including dives, energy expenditure and success rates can be seen in Table 4.

353

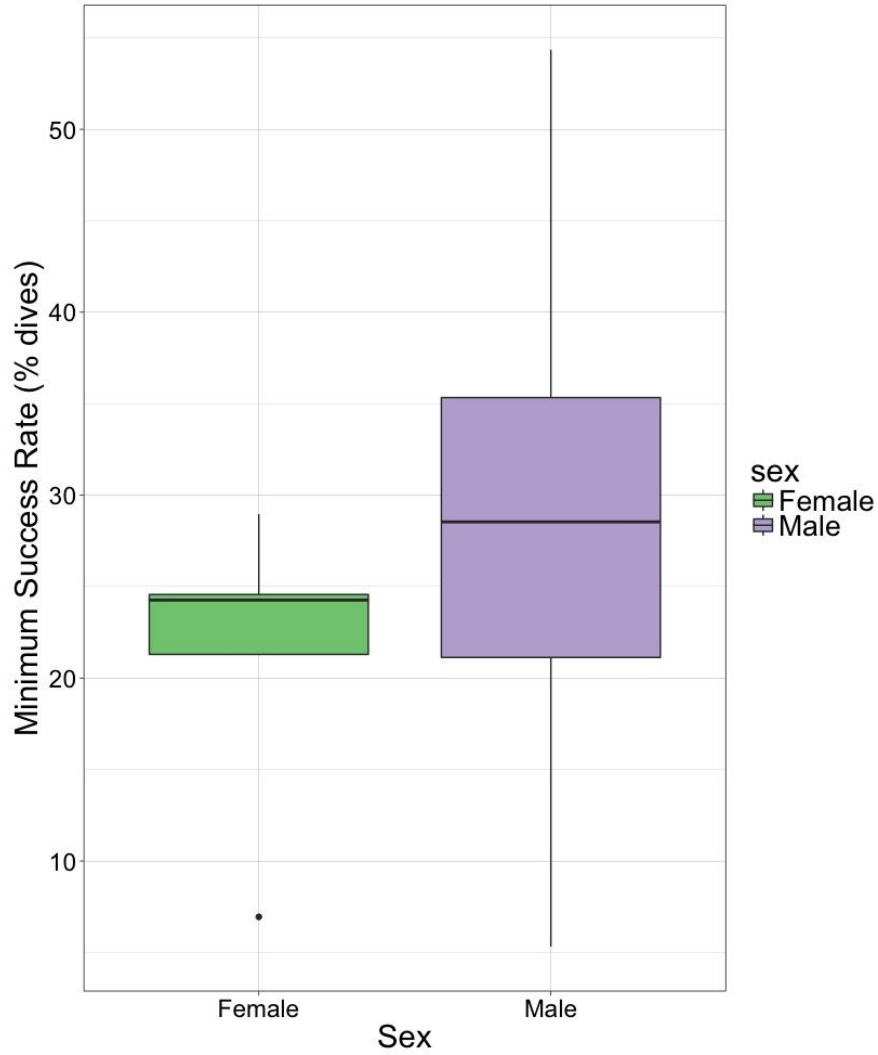

354

355 **Figure 3.** Minimum feeding success rates between the sexes to maintain body condition and  
356 feed a chick. Males were predicted to require a higher feeding success rate due to the lower  
357 numbers of dives undertaken.

358

359

360

361

362

363

364

| <i>Bird ID</i> | <i>Sex</i> | <i>Year of study</i> | <i>Tracking duration (Days)</i> | <i>Number of dives</i> | <i>Dives per day</i> | <i>Total energy expenditure during tracking (kJ)</i> | <i>Total energy expenditure during tracking plus chick demands (kJ)</i> | <i>Energy expenditure per day with chick demands (kJ)</i> | <i>Modelled average kJ per successful dive</i> | <i>Number of successful dives to meet energy demands</i> | <i>Percent of recorded dives needed to be successful</i> |
|----------------|------------|----------------------|---------------------------------|------------------------|----------------------|------------------------------------------------------|-------------------------------------------------------------------------|-----------------------------------------------------------|------------------------------------------------|----------------------------------------------------------|----------------------------------------------------------|
| D01            | Male       | 2017                 | 4.90                            | 113                    | 23.06                | 19017.89                                             | 21756.33                                                                | 4440                                                      | 1005.04                                        | 21.65                                                    | 19.16                                                    |
| D02            | Male       | 2017                 | 2.86                            | 36                     | 12.56                | 9977.19                                              | 11577.81                                                                | 4042                                                      | 1005.04                                        | 11.52                                                    | 31.99                                                    |
| D03            | Unknown    | 2017                 | 5.08                            | 189                    | 37.15                | 17676.91                                             | 21941.57                                                                | 4313                                                      | NA                                             | NA                                                       | NA                                                       |
| D04            | Female     | 2017                 | 0.97                            | 65                     | 66.89                | 3728.53                                              | 4543.13                                                                 | 4675                                                      | 1005.96                                        | 4.52                                                     | 6.94                                                     |
| D05            | Female     | 2017                 | 1.83                            | 39                     | 21.31                | 6820.18                                              | 8354.34                                                                 | 4565                                                      | 1005.96                                        | 8.30                                                     | 21.29                                                    |
| D12            | Female     | 2017                 | 4.68                            | 90                     | 19.19                | 18037.97                                             | 21968.74                                                                | 4685                                                      | 1005.96                                        | 21.84                                                    | 24.27                                                    |
| D13            | Male       | 2017                 | 4.72                            | 87                     | 18.44                | 16414.58                                             | 19050.09                                                                | 4040                                                      | 1005.04                                        | 18.95                                                    | 21.79                                                    |
| D16            | Male       | 2017                 | 1.99                            | 18                     | 9.06                 | 6742.38                                              | 7852.85                                                                 | 3952                                                      | 1005.04                                        | 7.81                                                     | 43.41                                                    |
| D25            | Female     | 2018                 | 3.04                            | 37                     | 12.17                | 11665.59                                             | 14212.90                                                                | 4677                                                      | 1563.34                                        | 9.09                                                     | 24.57                                                    |
| D26            | Male       | 2018                 | 2.92                            | 36                     | 12.31                | 12383.63                                             | 14017.50                                                                | 4794                                                      | 1552.61                                        | 9.02                                                     | 25.08                                                    |
| D28            | Male       | 2018                 | 4.61                            | 230                    | 49.84                | 16418.62                                             | 18997.12                                                                | 4117                                                      | 1552.61                                        | 12.24                                                    | 5.32                                                     |
| D41            | Male       | 2018                 | 4.83                            | 39                     | 8.07                 | 17065.3                                              | 19766.91                                                                | 4089                                                      | 1552.61                                        | 12.73                                                    | 32.64                                                    |
| D52            | Female     | 2018                 | 4.32                            | 42                     | 9.72                 | 15395.66                                             | 19016.77                                                                | 4402                                                      | 1563.34                                        | 12.16                                                    | 28.96                                                    |
| D53            | Male       | 2018                 | 5.05                            | 25                     | 4.95                 | 18274.86                                             | 21095.85                                                                | 4179                                                      | 1552.61                                        | 13.59                                                    | 54.35                                                    |

365

366 **Table 4.** Summary of results from tracked birds between 2017 and 2018. Energy expenditure is calculated from the formulae in figure 2 and  
367 chick demands are included by the amount of energy required by a four-week-old chick. Modelled average kJ per successful dive includes results  
368 from a Bayesian mixed model from isotope analysis and is produced as a figure for each sex per year.

## Discussion

369  
370  
371 Here we show that, for gannets, sex differences in foraging behaviour are not the result of  
372 divergent energetic costs of foraging or different energetic content of consumed prey. We   
373 suggest that sex differences in foraging behaviour are likely to have arisen from unequal  
374 energetic demands between the sexes coupled with resource partitioning to avoid intraspecific  
375 competition. SIA indicated sex-specific diets, but there was no difference in energy intake  
376 between the sexes. Cost of individual prey capture attempts associated with differing diets was  
377 low compared to total energetic expenditure, and despite females diving more than males, there  
378 was no difference in energetic expenditure per day between the sexes.

379 To the best of our knowledge, this is the first time that the energetic cost of individual prey  
380 capture attempts has been estimated in seabirds. Dynamic body acceleration is an established  
381 proxy measure of energy expenditure (74), though difficulties remain in converting DBA to a true  
382 measure of energy expenditure (26). Studies comparing DBA with energy expenditure must  
383 ensure that summed values of energy expenditure must not be regressed against sum values of  
384 DBA through time, a problem known as the time trap (75, 76). In this study we accounted for  
385 time, allowing for meaningful estimates of energy expenditure per unit time from DBA. Our  
386 method also bypasses the problem of changing metabolic rates, as we studied the cost of  
387 behaviour and locomotion only. The relationship between kilojoules and time intersects at 0,  
388 therefore avoiding the need to calibrate acceleration to metabolic rate (77). Though we do not  
389 account for the error of environmental influences, we have assumed that this variance is equal  
390 between individuals. The resulting energetic cost of prey capture events was low, even after  
391 including the cost of take-off from the sea surface following a dive, with all prey capture attempts  
392 across a foraging trip accounting for <4% of total energy expenditure. This suggests that the cost  
393 of diving probably does not limit the number of prey capture attempts in gannets, though we  
394 acknowledge this may not be true for birds struggling to meet daily energy demands. Sex  
395 differences in the energetic cost of individual prey capture attempts were minor and non-  
396 significant, albeit based on a small sample size. Despite females undertaking an average of eight  
397 more dives per day, the low cost of prey capture attempts resulted in no differences in daily

1  
2  
3 398 energetic expenditure between males and females. Females diving more may expend relatively  
4  
5 399 more energy as they spend more time underwater, however this is likely not the case as it has  
6  
7 400 been found that metabolic energy expenditure is not affected by the medium an animal moves  
8  
9 401 through (78). Year and dive type (plunge versus pursuit dive) had the largest effect on energetic  
10  
11 402 cost of diving, reflecting yearly differences in diet noted in SIA analysis, that are likely related to  
12  
13 403 the proportion of different dive types. 76% of dives were plunge dives with an almost immediate  
14  
15 404 rise to the surface, though 2017 contained 12.9% more pursuit dives than 2018. The increased  
16  
17 405 cost of underwater pursuit following a 'failed' plunge dive suggests a cost-benefit trade-off, and  
18  
19 406 Machovsky-Capuska, Vaughn (79) noted higher feeding success in pursuit dives in Australasian  
20  
21 407 gannets, *Morus serrator*, that would support this hypothesis.

22 408 Gannets forage on a wide variety of prey (80), and SIA models indicated divergent diets between  
23  
24 409 males and females, consistent with previous studies in gannets (42, 46). Prey proportions from  
25  
26 410 our SIA models were similar to those previously reported by Lewis, Sherratt (61) at the same site,  
27  
28 411 and we found females took proportionately more mackerel and less whiting, Norway pout, and  
29  
30 412 herring compared to males. Applying the average calorific content of prey species to sex-specific  
31  
32 413 diets, energetic gain per dive did not differ between sexes. However, females make a greater  
33  
34 414 contribution to chick provisioning (71), which may require a proportionate increase in targeting  
35  
36 415 of smaller sized prey for chick consumption. While this has been observed in other seabird  
37  
38 416 species (81), there is little evidence to suggest such specific prey targeting in provisioning gannets  
39  
40 417 whose chicks are capable of consuming quite large prey items. Our results support the suggestion  
41  
42 418 that divergent diet is not the result of differing energetic cost of prey capture, or energy content  
43  
44 419 of prey but may be a result of intersexual competition, as previously demonstrated in this  
45  
46 420 population of gannets (46).

47 421 Intraspecific competition is expected to be higher with increasing proximity to a breeding colony  
48  
49 422 (82, 83) and this competition may drive differing sexually divergent foraging behaviour in  
50  
51 423 gannets. Several studies report that male gannets forage closer to breeding colonies whilst  
52  
53 424 females travel further (42, 44). This may be due to male gannets outcompeting females forcing  
54  
55 425 them to travel further and undertaking different dive behaviour as they are forced to forage in

1  
2  
3 426 different habitat than males (45, 46). However, these studies concede that there is no strong  
4  
5 427 compelling evidence that sexual separation is entirely due to males outcompeting females.

6  
7 428 Different nutritional requirements between the sexes may also drive divergent foraging  
8  
9 429 behaviour. As the sexes search for different prey, they may engage in alternative prey capture  
10  
11 430 and foraging behaviour. One component of birds' life history strategy that may induce specific  
12  
13 431 nutrition demands is egg production. Egg production by females may cause a nutrient deficit (84,  
14  
15 432 85), specifically of calcium (86), which may drive different foraging behaviour as birds seek to  
16  
17 433 recover this loss (87). Gannets are known to lay small eggs in comparison to their body size (88)  
18  
19 434 so it is currently unknown how this may affect foraging requirements.

20  
21 435 Female gannets dived more frequently than males which may reflect differing provisioning roles  
22  
23 436 (89, 90), with female gannets estimated to have a 9.6% higher daily energetic demand, largely  
24  
25 437 because of their greater contribution to chick feeding (Montevecchi et al., 1984). After  
26  
27 438 accounting for the increased energetic demands in females, the energetic cost of foraging, the  
28  
29 439 mean calorific content of prey in sex-specific diets, and the number of dives performed, males  
30  
31 440 were predicted to have a higher minimum feeding success rate than females (21% of dives in  
32  
33 441 females and 29% of dives in males). These estimates of feeding success are lower than previous  
34  
35 442 estimates of approximately 50-66% for Australasian gannets based on identifying prey captures  
36  
37 443 from bird-borne cameras (91, 92). Our estimates reflect *minimum* success rates required to meet  
38  
39 444 energy demands, and the discrepancy suggests that gannets may routinely catch more food than  
40  
41 445 required to meet minimum energy demands that may be invested in chick provisioning, or that  
42  
43 446 they engage in energetically demanding activities around and within the colony such as preening  
44  
45 447 and aggression (88) that are not accounted for in our analysis.

46 448 Energy acquisition and allocation provide a useful framework to study ecological problems,  
47  
48 449 including management and evolution (93). This study highlights how DBA can estimate energetic  
49  
50 450 cost of discrete behaviours as well as overall energetic expenditure across defined time periods,  
51  
52 451 providing insights into the foraging ecology of free-ranging animals. While gannets are sexually  
53  
54 452 monomorphic, they show divergent foraging behaviour and diet, which our results suggest are  
55  
56 453 not the result of differing cost of foraging or energy content of prey. Such sexually divergent

1  
2  
3 454 foraging strategies in monomorphic species are thought to be driven by intersexual competition  
4  
5 455 or differing energy demands (20). In gannets, sex differences in foraging might be driven by a  
6  
7 456 combination of both processes; intersexual competition (46) and higher energetic demands in  
8  
9 457 females due to unequal chick provisioning. Female gannets meet this additional need through  
10  
11 458 increased dive rate, a strategy that has no appreciable additional cost given the small overall cost  
12  
13 459 of individual dives and may be an adapted strategy to account for competitive exclusion. Over  
14  
15 460 the course of a breeding season, this extra energetic expenditure equates to approximately 1567  
16  
17 461 kJ, less than the energy provided by one mackerel. However, after accounting for the cost of  
18  
19 462 dives, the energetic content of prey, and the number of dives performed, females appear to have  
20  
21 463 lower overall success rates to meet energetic requirements, suggesting some subtle difference  
22  
23 464 in foraging behaviour that remains unknown.

24 465 Our methodology and results have highlighted that in northern gannets, a sexually monomorphic  
25  
26 466 species, the sexes show differences in foraging behaviour primarily related to dive rate and  
27  
28 467 feeding success rather than the energetic cost of foraging. Evaluating sex differences in foraging  
29  
30 468 behaviour from an energetic perspective may provide a clearer picture for understanding  
31  
32 469 sexually divergent foraging strategies in both sexually monomorphic and dimorphic species.  
33  
34 470 Future research should consider an energetics approach in exploring the fine scale behavioural  
35  
36 471 differences between sexes.

## 472 **References**

- 473
- 474 1. Ginnett TF, Demment MW. Sex differences in giraffe foraging behavior at two spatial scales.  
475 *Oecologia*. 1997;110(2):291-300.
  - 476 2. Beck CA, Bowen WD, McMillan JI, Iverson SJ. Sex differences in diving at multiple temporal  
477 scales in a size - dimorphic capital breeder. *Journal of Animal Ecology*. 2003;72(6):979-93.
  - 478 3. Phillips R, Silk J, Phalan B, Catry P, Croxall J. Seasonal sexual segregation in two *Thalassarche*  
479 albatross species: competitive exclusion, reproductive role specialization or foraging niche divergence?  
480 *Proceedings of the Royal Society of London Series B: Biological Sciences*. 2004;271(1545):1283-91.
  - 481 4. Patrick SC, Weimerskirch H. Consistency pays: sex differences and fitness consequences of  
482 behavioural specialization in a wide-ranging seabird. *Biology letters*. 2014;10(10):20140630.
  - 483 5. Wanless S, Harris M, Morris J. Factors affecting daily activity budgets of South Georgian shags  
484 during chick rearing at Bird Island, South Georgia. *The Condor*. 1995;97(2):550-8.
  - 485 6. Maklakov AA, Simpson SJ, Zajitschek F, Hall MD, Dessimann J, Clissold F, et al. Sex-specific fitness  
486 effects of nutrient intake on reproduction and lifespan. *Current Biology*. 2008;18(14):1062-6.



- 1  
2  
3 487 7. Reddiex AJ, Gosden TP, Bonduriansky R, Chenoweth SF. Sex-specific fitness consequences of  
4 488 nutrient intake and the evolvability of diet preferences. *The American Naturalist*. 2013;182(1):91-102.
- 5 489 8. Kokko H, Jennions MD. Sex differences in parental care. *The Evolution Of Parental Care*. 484:  
6 490 Oxford University Press; 2012.
- 7 491 9. Rogowitz GL, Chappell MA. Energy metabolism of eucalyptus-boring beetles at rest and during  
8 492 locomotion: gender makes a difference. *Journal of Experimental Biology*. 2000;203(7):1131-9.
- 9 493 10. Lees JJ, Nudds RL, Folkow LP, Stokkan K-A, Codd JR. Understanding sex differences in the cost of  
10 494 terrestrial locomotion. *Proceedings of the Royal Society B: Biological Sciences*. 2011;279(1729):826-32.
- 11 495 11. Biggerstaff MT, Lashley MA, Chitwood MC, Moorman CE, DePerno CS. Sexual segregation of  
12 496 forage patch use: support for the social-factors and predation hypotheses. *Behavioural processes*.  
13 497 2017;136:36-42.
- 14 498 12. Galezo AA, Krzyszczyk E, Mann J. Sexual segregation in Indo-Pacific bottlenose dolphins is driven  
15 499 by female avoidance of males. *Behavioral Ecology*. 2017;29(2):377-86.
- 16 500 13. Pincheira - Donoso D, Tregenza T, Butlin RK, Hodgson DJ. Sexes and species as rival units of  
17 501 niche saturation during community assembly. *Global Ecology and Biogeography*. 2018;27(5):593-603.
- 18 502 14. González - Solís J, Croxall JP, Wood AG. Sexual dimorphism and sexual segregation in foraging  
19 503 strategies of northern giant petrels, *Macronectes halli*, during incubation. *Oikos*. 2000;90(2):390-8.
- 20 504 15. Ruckstuhl K, Neuhaus P. Sexual segregation in ungulates: a new approach. *Behaviour*.  
21 505 2000;137(3):361-77.
- 22 506 16. Salton M, Kirkwood R, Slip D, Harcourt R. Mechanisms for sex-based segregation in foraging  
23 507 behaviour by a polygynous marine carnivore. *Marine Ecology Progress Series*. 2019;624:213-26.
- 24 508 17. Ehl S, Hostert K, Korsch J, Gros P, Schmitt T. Sexual dimorphism in the alpine butterflies *Boloria*  
25 509 *pales* and *Boloria napaea*: differences in movement and foraging behavior (*Lepidoptera: Nymphalidae*).  
26 510 *Insect Science*. 2018;25(6):1089-101.
- 27 511 18. Tina F, Jaroensutasinee M, Jaroensutasinee K. Effects of sexual dimorphism and body size on  
28 512 feeding behaviour of the fiddler crab, *Uca bengali* Crane, 1975. *Crustaceana*. 2015;88(2):231-42.
- 29 513 19. Wearmouth VJ, Sims DW. Sexual segregation in marine fish, reptiles, birds and mammals:  
30 514 behaviour patterns, mechanisms and conservation implications. *Advances in marine biology*.  
31 515 2008;54:107-70.
- 32 516 20. Pinet P, Jaquemet S, Phillips RA, Le Corre M. Sex-specific foraging strategies throughout the  
33 517 breeding season in a tropical, sexually monomorphic small petrel. *Animal Behaviour*. 2012;83(4):979-89.
- 34 518 21. Elliott K, Gaston A, Crump D. Sex-specific behavior by a monomorphic seabird represents risk  
35 519 partitioning. *Behavioural Ecology*. 2010;21:1024 - 32.
- 36 520 22. Smith EAE, Newsome SD, Estes JA, Tinker MT. The cost of reproduction: differential resource  
37 521 specialization in female and male California sea otters. *Oecologia*. 2015;178(1):17-29.
- 38 522 23. MacArthur RH, Pianka ER. On optimal use of a patchy environment. *The American Naturalist*.  
39 523 1966;100(916):603-9.
- 40 524 24. Tullock G. The coal tit as a careful shopper. *The American Naturalist*. 1971;105(941):77-80.
- 41 525 25. Pulliam HR. On the theory of optimal diets. *The American Naturalist*. 1974;108(959):59-74.
- 42 526 26. Wilson RP, Börger L, Holton MD, Scantlebury DM, Gómez - Laich A, Quintana F, et al. Estimates  
43 527 for energy expenditure in free - living animals using acceleration proxies; a reappraisal. *Journal of*  
44 528 *Animal Ecology*. 2019;89:161-72.
- 45 529 27. Brown DD, Kays R, Wikelski M, Wilson R, Klimley AP. Observing the unwatchable through  
46 530 acceleration logging of animal behavior. *Animal Biotelemetry*. 2013;1(1):20.
- 47 531 28. Butler PJ, Green JA, Boyd I, Speakman J. Measuring metabolic rate in the field: the pros and cons  
48 532 of the doubly labelled water and heart rate methods. *Functional ecology*. 2004;18(2):168-83.
- 49  
50  
51  
52  
53  
54  
55  
56  
57  
58  
59  
60

- 1  
2  
3 533 29. Green JA. The heart rate method for estimating metabolic rate: review and recommendations.  
4 534 Comparative Biochemistry and Physiology Part A: Molecular & Integrative Physiology. 2011;158(3):287-  
5 535 304.  
6 536 30. Frappell P, Blevin H, Baudinette R. Understanding respirometry chambers: what goes in must  
7 537 come out. Journal of Theoretical Biology. 1989;138(4):479-94.  
8 538 31. Shepard EL, Wilson RP, Quintana F, Laich AG, Liebsch N, Albareda DA, et al. Identification of  
9 539 animal movement patterns using tri-axial accelerometry. Endangered Species Research. 2008;10:47-60.  
10 540 32. Gleiss AC, Wilson RP, Shepard EL. Making overall dynamic body acceleration work: on the theory  
11 541 of acceleration as a proxy for energy expenditure. Methods in Ecology and Evolution. 2011;2(1):23-33.  
12 542 33. Halsey L, Shepard E, Quintana F, Laich AG, Green J, Wilson R. The relationship between oxygen  
13 543 consumption and body acceleration in a range of species. Comparative Biochemistry and Physiology Part  
14 544 A: Molecular & Integrative Physiology. 2009;152(2):197-202.  
15 545 34. Halsey LG, Shepard EL, Wilson RP. Assessing the development and application of the  
16 546 accelerometry technique for estimating energy expenditure. Comparative Biochemistry and Physiology  
17 547 Part A: Molecular & Integrative Physiology. 2011;158(3):305-14.  
18 548 35. Goldsworthy B, Young MJ, Seddon PJ, van Heezik Y. Stomach flushing does not affect apparent  
19 549 adult survival, chick hatching, or fledging success in yellow-eyed penguins (*Megadyptes antipodes*).  
20 550 Biological Conservation. 2016;196:115-23.  
21 551 36. Thiebault A, Semeria M, Lett C, Tremblay Y. How to capture fish in a school? Effect of successive  
22 552 predator attacks on seabird feeding success. Journal of Animal Ecology. 2016;85(1):157-67.  
23 553 37. Hobson KA. Trophic relationships among high Arctic seabirds: insights from tissue-dependent  
24 554 stable-isotope models. Marine Ecology Progress Series. 1993;95:7-  
25 555 38. Hobson KA, Piatt JF, Pitocchelli J. Using stable isotopes to determine seabird trophic  
26 556 relationships. Journal Of Animal Ecology. 1994:786-98.  
27 557 39. Bond AL, Jones IL. A practical introduction to stable-isotope analysis for seabird biologists:  
28 558 approaches, cautions and caveats. Marine Ornithology. 2009;37(3):183-8.  
29 559 40. Stock BC, Semmens BX. Unifying error structures in commonly used biotracer mixing models.  
30 560 Ecology. 2016;97(10):2562-9.  
31 561 41. Deakin Z, Hamer KC, Sherley RB, Bearhop S, Bodey TW, Clark BL, et al. Sex differences in  
32 562 migration and demography of a wide-ranging seabird, the northern gannet. Marine Ecology Progress  
33 563 Series. 2019;622:191-201.  
34 564 42. Stauss C, Bearhop S, Bodey T, Garthe S, Gunn C, Grecian W, et al. Sex-specific foraging behaviour  
35 565 in northern gannets, *Morus bassanus*; incidence and implications. Marine Ecology Progress Series.  
36 566 2012;457:151-62.  
37 567 43. Malvat Z, Lynch S, Bennison A, Jessopp M. Evidence of links between haematological condition  
38 568 and foraging behaviour in northern gannets (*Morus bassanus*). Royal Society Open Science.  
39 569 2020;7(5):192164.  
40 570 44. Lewis S, Benvenuti S, Dall–Antonia L, Griffiths R, Money L, Sherratt T, et al. Sex-specific foraging  
41 571 behaviour in a monomorphic seabird. Proceedings of the Royal Society of London B: Biological Sciences.  
42 572 2002;269(1501):1687-93.  
43 573 45. Cleasby IR, Wakefield ED, Bodey TW, Davies RD, Patrick SC, Newton J, et al. Sexual segregation in  
44 574 a wide-ranging marine predator is a consequence of habitat selection. Marine Ecology Progress Series.  
45 575 2015;518:1-12.  
46 576 46. Giménez J, Arneill GE, Bennison A, Pirota E, Gerritsen HD, Bodey TW, et al. Sexual mismatch  
47 577 between vessel-associated foraging and discard consumption in a marine top predator. Frontiers in  
48 578 Marine Science. 2021;8:220.

- 1  
2  
3 579 47. Bodey TW, Cleasby IR, Votier SC, Hamer KC, Newton J, Patrick SC, et al. Frequency and  
4 580 consequences of individual dietary specialisation in a wide-ranging marine predator, the northern  
5 581 gannet. *Marine Ecology Progress Series*. 2018;604:251-62.
- 6 582 48. Vandenabeele SP, Shepard EL, Grogan A, Wilson RP. When three per cent may not be three per  
7 583 cent; device-equipped seabirds experience variable flight constraints. *Mar Biol*. 2012;159(1):1-14.
- 8 584 49. Griffiths R, Double MC, Orr K, Dawson RJ. A DNA test to sex most birds. *Molecular Ecology*.  
9 585 1998;7(8):1071-5.
- 10 586 50. Collins PM, Green JA, Warwick - Evans V, Dodd S, Shaw PJ, Arnould JP, et al. Interpreting  
11 587 behaviors from accelerometry: a method combining simplicity and objectivity. *Ecology And Evolution*.  
12 588 2015;5(20):4642-54.
- 13 589 51. Shepard EL, Wilson RP, Halsey LG, Quintana F, Laich AG, Gleiss AC, et al. Derivation of body  
14 590 motion via appropriate smoothing of acceleration data. *Aquatic Biology*. 2008;4(3):235-41.
- 15 591 52. Wilson RP, White CR, Quintana F, Halsey LG, Liebsch N, Martin GR, et al. Moving towards  
16 592 acceleration for estimates of activity - specific metabolic rate in free - living animals: the case of the  
17 593 cormorant. *Journal of Animal Ecology*. 2006;75(5):1081-90.
- 18 594 53. Patterson A, Gilchrist HG, Chivers L, Hatch S, Elliott K. A comparison of techniques for classifying  
19 595 behavior from accelerometers for two species of seabird. *Ecology and Evolution*. 2019;9(6):3030-45.
- 20 596 54. Qasem L, Cardew A, Wilson A, Griffiths I, Halsey LG, Shepard EL, et al. Tri-axial dynamic  
21 597 acceleration as a proxy for animal energy expenditure; should we be summing values or calculating the  
22 598 vector? *PloS ONE*. 2012;7(2):e31187.
- 23 599 55. Schmidt-Nielsen K, Knut S-N. *Scaling: why is animal size so important?: Cambridge university  
24 600 press; 1984.*
- 25 601 56. Hicks O, Burthe S, Daunt F, Butler A, Bishop C, Green JA. Validating accelerometry estimates of  
26 602 energy expenditure across behaviours using heart rate data in a free-living seabird. *Journal of  
27 603 Experimental Biology*. 2017;220(10):1875-81.
- 28 604 57. Dunn RE, White CR, Green JA. A model to estimate seabird field metabolic rates. *Biology Letters*.  
29 605 2018;14(6):20180190.
- 30 606 58. Jennings S, Cogan S. Nitrogen and carbon stable isotope variation in northeast Atlantic fishes  
31 607 and squids: *Ecological Archives E096 - 226*. *Ecology*. 2015;96(9):2568-.
- 32 608 59. Logan JM, Jardine TD, Miller TJ, Bunn SE, Cunjak RA, Lutcavage ME. Lipid corrections in carbon  
33 609 and nitrogen stable isotope analyses: comparison of chemical extraction and modelling methods.  
34 610 *Journal of Animal Ecology*. 2008;77(4):838-46.
- 35 611 60. Phillips DL, Inger R, Bearhop S, Jackson AL, Moore JW, Parnell AC, et al. Best practices for use of  
36 612 stable isotope mixing models in food-web studies. *Canadian Journal of Zoology*. 2014;92(10):823-35.
- 37 613 61. Lewis S, Sherratt TN, Hamer KC, Harris MP, Wanless S. Contrasting diet quality of northern  
38 614 gannets, *Morus bassanus*, at two colonies. *Ardea*. 2003;91(2):167-76.
- 39 615 62. Hobson KA, Clark RG. Assessing avian diets using stable isotopes II: factors influencing diet-tissue  
40 616 fractionation. *The Condor*. 1992;94(1):189-97.
- 41 617 63. Bearhop S, Waldron S, Votier SC, Furness RW. Factors that influence assimilation rates and  
42 618 fractionation of nitrogen and carbon stable isotopes in avian blood and feathers. *Physiological And  
43 619 Biochemical Zoology*. 2002;75(5):451-8.
- 44 620 64. Forero MG, Tella JL, Hobson KA, Bertellotti M, Blanco G. Conspecific food competition explains  
45 621 variability in colony size: a test in Magellanic penguins. *Ecology*. 2002;83(12):3466-75.
- 46 622 65. Cherel Y, Hobson KA, Hassani S. Isotopic discrimination between food and blood and feathers of  
47 623 captive penguins: implications for dietary studies in the wild. *Physiological And Biochemical Zoology*.  
48 624 2005;78(1):106-15.
- 49 625 66. Gelman A, Carlin JB, Stern HS, Dunson DB, Vehtari A, Rubin DB. *Bayesian Data Analysis:  
50 626 Chapman and Hall/CRC; 2013.*

- 1  
2  
3 627 67. Semmens BX, Stock B, Ward E, Moore JW, Parnell A, Jackson AL, et al. MixSIAR: A Bayesian  
4 628 stable isotope mixing model for characterizing intrapopulation niche variation. Ecological Society of  
5 629 America, Minneapolis, MN. 2013:04-9.
- 6 630 68. Vehtari A, Gelman A, Gabry J. Practical Bayesian model evaluation using leave-one-out cross-  
7 631 validation and WAIC. *Statistics And Computing*. 2017;27(5):1413-32.
- 8 632 69. Barton K. MuMIn: Multi-model inference. R package version 1.0.0. Vienna, Austria: R  
9 633 Foundation for Statistical Computing See [http://CRAN](http://CRAN.R-project.org/package=MuMIn)  
10 634 70. Harrison XA, Donaldson L, Correa-Cano ME, Evans J, Fisher DN, Goodwin CE, et al. A brief  
11 635 introduction to mixed effects modelling and multi-model inference in ecology. *PeerJ*. 2018;6:e4794.
- 12 636 71. Montevecchi WA, Ricklefs R, Kirkham I, Gabaldon D. Growth energetics of nestling northern  
13 637 gannets (*Sula bassanus*). *The Auk*. 1984;101(2):334-41.
- 14 638 72. Montevecchi W, Kirkham I, Purchase R, Harvey B. Colonies of Northern Gannets in  
15 639 Newfoundland. *Osprey*. 1980;11:2-8.
- 16 640 73. Cooper J. Energetic requirements for growth and maintenance of the Cape gannet (*Aves*;  
17 641 *Sulidae*). *African Zoology*. 1978;13(2):305-17.
- 18 642 74. Elliott K, Le Vaillant M, Kato A, Speakman J, Ropert-Coudert Y. Accelerometry predicts daily  
19 643 energy expenditure in a bird with high activity levels. *Biology Letters*. 2013;9:20120919.
- 20 644 75. Halsey LG. Relationships grow with time: a note of caution about energy expenditure - proxy  
21 645 correlations, focussing on accelerometry as an example. *Functional Ecology*. 2017;31(6):1176-83.
- 22 646 76. Ladds MA, Rosen DA, Slip DJ, Harcourt RG. Proxies of energy expenditure for marine mammals:  
23 647 an experimental test of "the time trap". *Scientific Reports*. 2017;7(1):1-10.
- 24 648 77. Halsey LG, Bryce CM. Proxy problems: why a calibration is essential for interpreting quantified  
25 649 changes in energy expenditure from biologging data. *Functional Ecology*. 2021;35(3):627-34.
- 26 650 78. Laich AG, Wilson RP, Gleiss AC, Shepard EL, Quintana F. Use of overall dynamic body  
27 651 acceleration for estimating energy expenditure in cormorants: does locomotion in different media affect  
28 652 relationships? *Journal of Experimental Marine Biology and Ecology*. 2011;399(2):151-5.
- 29 653 79. Machovsky-Capuska GE, Vaughn RL, Würsig B, Katzir G, Raubenheimer D. Dive strategies and  
30 654 foraging effort in the Australasian gannet, *Morus serrator*, revealed by underwater videography. *Marine*  
31 655 *Ecology Progress Series*. 2011;442:255-61.
- 32 656 80. Hamer K, Humphreys E, Garthe S, Hennicke J, Peters G, Grémillet D, et al. Annual variation in  
33 657 diets, feeding locations and foraging behaviour of gannets in the North Sea: flexibility, consistency and  
34 658 constraint. *Marine Ecology Progress Series*. 2007;338:295-305.
- 35 659 81. Davoren GK, Burger AE. Differences in prey selection and behaviour during self-feeding and  
36 660 chick provisioning in rhinoceros auklets. *Animal Behaviour*. 1999;58(4):853-63.
- 37 661 82. Ashmole NP. Seabird ecology and the marine environment. *Avian Biology*. 1971;1:223-86.
- 38 662 83. Wakefield ED, Bodey TW, Bearhop S, Blackburn J, Colhoun K, Davies R, et al. Space Partitioning  
39 663 Without Territoriality in Gannets. *Science*. 2013;341(6141):68-70.
- 40 664 84. Scanes CG, Campbell R, Griminger P. Control of energy balance during egg production in the  
41 665 laying hen. *The Journal of Nutrition*. 1987;117(3):605-11.
- 42 666 85. Perrins C. Eggs, egg formation and the timing of breeding. *Ibis*. 1996;138(1):2-15.
- 43 667 86. Keshavarz K. The effect of dietary levels of calcium and phosphorus on performance and  
44 668 retention of these nutrients by laying hens. *Poultry Science*. 1986;65(1):114-21.
- 45 669 87. Reynolds SJ, Perrins CM. Dietary calcium availability and reproduction in birds. *Current*  
46 670 *Ornithology Volume 17: Springer*; 2010. p. 31-74.
- 47 671 88. Nelson B. *The Atlantic Gannet*: Fenix Books; 2002.
- 48 672 89. Grieco F. Short-term regulation of food-provisioning rate and effect on prey size in blue tits,  
49 673 *Parus caeruleus*. *Animal Behaviour*. 2001;62(1):107-16.

- 1  
2  
3 674 90. Limmer B, Becker PH. Improvement in chick provisioning with parental experience in a seabird.  
4 675 Animal Behaviour. 2009;77(5):1095-101.  
5 676 91. Cansse T, Fauchet L, Wells M, Arnould J. Factors influencing prey capture success and  
6 677 profitability in Australasian gannets (*Morus serrator*). Biology Open. 2020;9:1.  
7 678 92. Wells MR, Angel LP, Arnould JP. Habitat-specific foraging strategies in Australasian gannets.  
8 679 Biology Open. 2016;5(7):921-7.  
9 680 93. Karasov W. Energetics, physiology and vertebrate ecology. Trends in Ecology & Evolution.  
10 681 1986;1(4):101-4.  
11 682  
12  
13  
14  
15  
16  
17  
18  
19  
20  
21  
22  
23  
24  
25  
26  
27  
28  
29  
30  
31  
32  
33  
34  
35  
36  
37  
38  
39  
40  
41  
42  
43  
44  
45  
46  
47  
48  
49  
50  
51  
52  
53  
54  
55  
56  
57  
58  
59  
60

## Appendix B

Dear Editor,

Please find attached our resubmitted manuscript '*A bioenergetics approach to understanding sex differences in the foraging behaviour of a sexually monomorphic species*' for consideration by Open Science. We were very pleased at the positive responses of associate editors and reviewers, and have taken on board their comments and suggestions as outlined below. Additionally, elements of this work were presented at the World Seabird Conference, during which Dr Jonathan Green, a noted expert in seabird energetics, provided some excellent feedback. We have since liaised with him to incorporate some further refinements in addition to those of the reviewers, mostly centred on providing more details on the methodology. We hope you agree that the changes we have made have improved the manuscript and that it is now suitable for publication.

Thanks to his input we have now included Dr Green as an author on the paper, all current authors agree with this addition, we feel his additions have improved the manuscript and his inputs warrant authorship.

Best regards,

Ashley Bennison, on behalf of co-authors

### **Associate Editor Comments to Author (Dr Agustina Gómez-Laich):**

In this study, the authors used a bioenergetic approach to examine intersexual differences in the foraging behavior of a sexually monomorphic seabird; the Northern Gannet. To do this, they instrumented female and male breeding gannets with GPSs, accelerometers, and TDRs. Energy expenditure was estimated using dynamic body acceleration and afterward converted to kilojoules. Additionally, Stable Isotope Analyses was employed to study intersexual differences in diet and to estimate each sex's energy acquisition. The study's main finding is that sex differences in foraging behavior are mainly associated with dive rate and success. This study provides an important contribution to science, but the methods and discussion sections need to be improved. I feel authors should address some general and specific issues (see below) before the manuscript can be published.

**Authors response: Thank you for your review – we have reworked much of the methodology and discussion to try and make things clearer. Additionally, this work has since been presented at the World Seabird Conference, during which Dr Jonathan Green provided some excellent feedback which has helped to correct methods. We hope the changes we have made throughout the manuscript are appropriate.**

General comments

1) Please present in a more explicit way the hypothesis you are testing. This would help to structure the manuscript. Additionally, it would greatly improve the manuscript

if authors refer to the main questions and hypotheses/predictions along with the methodology, results, and discussion sections. For example, several sections of the discussion refer to the methodology employed to estimate energy expenditure. Even though this is an important aspect of the Ms, it is not one of the main objectives.

**Authors response: we have now included three specific hypotheses to tie the manuscript together better. These can be found on line 204-210 and are:**

“

- 1) Sex differences in the foraging ecology of gannets derive from the different energetic demands placed upon the sexes.
- 2) Being a monomorphic species, there will be no difference in the cost of prey capture attempts between the sexes.
- 3) Due to differing energy demands and foraging behaviour, the sexes will have different prey capture success rates.

“

2) Several sections of the methodology need to be better explained (see below).

**Authors response: [All sections of the methodology have been refined providing more detailed explanations as set out in response to specific points below.**

3) Results could be improved by incorporating more tables for example as Supplementary material.

**Authors response: The supplementary material has been expanded to include 5 tables and 2 figures – with explanation.**

4) The discussion could be greatly improved if authors focused more on debating their findings and how they contribute to the main hypothesis. Many paragraphs repeat information that was already mentioned in the results.

**Authors response: We have amended the discussion to better relate the findings to the hypotheses tested and in the context of other studies.**

Specific comments

Keywords: accelerometry instead of accelerometry

Keywords: Isotope or isotope?

**Authors response: Thank you – we have changed the keywords as suggested**

Introduction

Lines 77-79. It would be interesting to explain how foraging at different locations may benefit females to restore their body condition after egg production.

**Authors response: We have included a statement to describe this more effectively. This can now be found on line 93.**

Lines 79-81. Can you give an example of how sex-specific foraging strategies in sexually monomorphic species may be driven by intraspecific competition causing one sex to be displaced spatially or to forage in different niches?

**Authors response: Included example using brown boobies on line 99.**

Lines 76-86. In this second paragraph, the first and fourth sentences present very similar ideas.

**Authors response: To ease flow we have deleted the second sentence. This paragraph is now lines 92-103.**

Line 102. Please give examples of other direct methods.

**Authors response: We have included the direct methods of regurgitate sampling and direct observation of foraging. This is now on line 166:**

“However, Stable Isotope Analysis (SIA) is a minimally invasive technique that can provide diet information and, in seabird studies, is known to correlate well with other more direct methods such as regurgitate sampling and direct observation of foraging”

Line 103. Can you briefly explain what each isotopic ratio allows us to know about prey consumption?

**Authors response: This has been expanded and can be found on line 168-171:**

“Both carbon and nitrogen can be considered as indicators of the trophic level an animal is foraging at (41). Nitrogen isotopes enrich at a faster rate in predators than carbon isotopes, but the ratio between them can inform trophic level, trophic niche width, and diet”

Line 107. Please add what this marginally heavier means.

**Authors response: We have added a reference to show approximately 200g difference between the sexes which corresponds to approximately 6% of body mass. This is now on line 175:**

“While females are marginally heavier than males (Approximately 200g, or 6% (45)), weight alone cannot be used to sex individuals”

Line 114-115. Than forage fish female specialist sounds awkward.

**Authors response: This sentence has now been reworded so it reads better. It is now on line 182:**

“Females that specialise on fisheries discards travel shorter distances than those who specialise on foraging for fish, although this distinction is not apparent among males”



Line 119-125. I suggest rephrasing this last paragraph. First, mention the objectives and then the methodology you will use to reach them. Additionally, It would be interesting to be more explicit with the hypothesis you are testing (see general comments). It would also be interesting to present some predictions.

**Authors response: This has been rephrased and hypotheses included. This can now be found on line 197-210.**

## Methodology

Line 140. Figure 1 does not show the conceptual diagram of the study. This figure shows a diagram of a part of the methodology.

**Authors response: This is has been changed to: “A visual diagram of the methodology is presented in figure 1.” This can now be found on line 240.**

Line 140. How many males, and how many females were instrumented? Did you instrument pairs? How much time were the devices left on the birds? This information is mentioned in the results instead of being in the methodology. Did birds that were instrumented continued breeding normally?

**Authors response: We have now included this information (five females and eight males) in the methods with time devices were on birds. We have also included a statement in this paragraph stating that we only deployed on a single parent within breeding pairs and that all pairs were observed continuing chick-rearing including feeding following the deployments. This paragraph can be found on line 240-263.**

Line 141. This means that in some nests chicks were 21 days old and in other chicks were more than a month? Is the foraging behavior similar during both stages of the breeding season (3 vs 5 weeks old chicks)? Please incorporate information regarding this particular topic.

**Authors response: Unfortunately it was not possible to work with chicks at the exact same ages, but tried to work with breeding birds that had chicks of similar age based on morphological descriptions. Gannets feed their chicks over a 12-13 week period before fledging, and the energy requirements of 3-4 week old chicks are largely similar (Montevecchi et al 1984), and so we considered this was appropriate.**

Please add the dimensions of each one of the loggers you deployed on the birds.

**Authors response: These have been added and can be seen on line 246-250: “GPS loggers (i-gotU GT-120, Mobile Action Technology Inc., Taipei, Taiwan, 14g, Dimensions: 4 x 2 x 1 cm)) recorded locations every 3 minutes; time depth recorders (TDR, CEFAS G5, 2.5g, Dimensions: 2 x 1 x 1 cm) recorded depth at 4Hz after exceeding a 0.5 or 1m depth threshold; tri-axial accelerometers (Gulf Coast Data Concepts X16-mini, 17g, Dimensions: 6 x 2 x 1 cm)”**

Line 152. How much blood was taken? From where was the blood sample taken?

**Authors response: Approximately between 1 and 1.5 ml were taken from the tarsus. This has been added to the methods on line 259:**

“Between 1 and 1.5ml of blood was sampled from the tarsus vein for stable isotope analysis”

Figure 1. I suggest including which were the defined behaviors.

**Authors response: This has now been changed to say dive behaviours. This can be seen on line 274.**

Line 159-160. “further methods that develop the findings” sounds awkward. Please rephrase.

**Authors response: This has been reworded and can be seen on line 279:**

“Blue boxes represent the methodology for analysing data and orange boxes represent additional analysis.”

Line 162. Please explain more in detail how you analyze the acceleration data. To obtain a time-activity budget and estimate the energy expenditure during a foraging trip, not only the dives should be identified from the acc data. How did you recognize when birds were flying and floating? Equations to estimate energy expenditure from VeDBA may be activity-specific. For example, the equation used to derive energy expenditure for flying and diving may be different. Was this taken into account? Please give more details about this particular subject. Additionally, please give more details about how the acceleration data was processed. Once you had the acceleration data, you calculated the average value for each of the axes using a running mean of 2 seconds? How did you calculate the pitch values from the acc data? What does the X, Z, and Y-axis mean? Please specify which is the heave, sway and surge.

**Authors response: We have tried to further explain the accelerometry process – we hope we have made the explanation clearer.**

**We have included the alternative name for each axis (surge, heave, and sway) as each one is first used but kept the namings of X-axis and Z-axis in the manuscript after this.**

**We have not undertaken a specific behavioural budget approach in this study. A large challenge with accelerometry data is understanding what signal relates to which specific behaviour. This is not possible on occasions where an animal is out of sight or is undertaking an unknown behaviour.**

**Furthermore, there are no equations to estimate energy expenditure directly from VeDBA for this (and the vast majority of other) species. Instead we adopt a new, simple, approach which allows estimation of the amount of energy used from VeDBA for specific periods of time or specific activities, for groups of animals. Firstly, we assume basal metabolic rate (BMR) and overall field metabolic rate (FMR) to be constant and defined only by each focal bird's mass (and latitude and species in the case of seabirds). This is**

understandably a simplification but we hope we have addressed the consequences and limitations of our simple approach appropriately in the manuscript. Secondly, we use VeDBA scores to reflect energetic investment in a suite of behaviours, under a fundamental assumption that one unit of VeDBA is equivalent to a consistent amount of energy used, independent of time. A 24 hour period can contain many behaviours but the sum of VeDBA will reflect the costs of all of these between BMR and FMR. Based on this, the relationship between movement (VeDBA) and energy expenditure associated with periods of movement can be considered as linear. By combining these assumptions, we can start to estimate energetic costs of movement in different groups of the same species, in this case males and females. This is now explained in full in the manuscript.

Lines 172-175. It would be nice to see a figure of the bimodal distribution accelerometer-derived dives had as supplementary information.

**Authors response: This has now been included in supplementary materials and has been mentioned in the main text on line 294.**

Line 177. To do this first you had to obtain the time-activity budget of the birds, that is to say, how much time each bird expended on each activity. For this, the acceleration data such me labeled. How did you do this? Visually? Using some algorithm? Please give more details about this.

**Authors response: We hope this has now been clarified in the text and explained above (comment for line 162).**

Line 179. Please explain how you calculated VeDBA. It is not clear if you calculated the VeDBA for each activity (flying, floating, diving) and once this had been done using a specific equation to convert this VeDBA value into kilojoules. Which allometric equations did you use? It would be worth incorporating this as supplementary information also.

**Authors response: We have provided more detailed information in the methods and hope this is now clearer. VeDBA was calculated across the tagging period, incorporating the entire range of behaviours and values converted to energy expenditure in kJ. This section has received considerable work and can be seen from line 298-365.**

Line 191. What does the individualized VeDBA to kJ equation mean?

**Authors response: The process for converting VeDBA to kJ uses an equation based on the difference between the estimates of resting metabolic rate and field metabolic rate. These estimates are more accurate when considering an animal's weight and so the process was undertaken for each gannet individually to produce unique gradients (slope k in figure 2.). The text has been changed to reflect this and can be seen on line 322.**

Line 193. Couldn't you use the TDR information to determine when birds were on the surface?

**Authors response: Unfortunately this was not a reliable method as the TDRs were set to activate by pressure (<0.5m depth) and so did not register wet/dry to determine rest periods on the water.**

Line 204. n=19 in 2017 and n=28 in 2018 should be placed after 47 birds.

**Authors response: This has been moved and can now be seen on line 257.**

Line 234. Here it says LMER but in the results it says GLM. Did you perform an LMER or a GLM? Please add which distribution was used and why.

**Authors response: This was an LMER. The result of the averaged LMER is presented at the beginning of the first section of the results entitled "Sex differences in dive behaviour." The GLM presented at the end of this section was not specifically mentioned in the methods and was an oversight. We have now included this in the methods section on line 433:**

"The rates of dives per day between females and males was tested using a general linear regression, with dive rate as the response, predicted by sex as a factor. To determine if sex influences daily energy expenditure an LMER was used to predict energy expenditure (per day) from sex and year, with ID as a random effect to account for repeated measures from individuals."

Line 235. Please explain why the interaction between year and dive type was included in the model.

**Authors response: The model did not include the interaction between year and dive type but did include the interaction between sex and dive type. This was included as females are slightly heavier, which may influence the cost of a dive. We have included a sentence to clarify this on line 429:**

"The interaction between sex and dive type was included to explore if the different masses of the sexes (Approximately 200 g (45)) impacted the cost of a dive type"

Line 239. In general, there seems to be some controversy about model averaging. If your top model has relatively good support (as compared to second-best models) some suggested it may be better to refrain from model averaging. Why did you choose to do model averaging? Please explain how you obtained the average. It would be interesting to incorporate a table with the best models, their AIC, deltaic, and weight as supplementary material.

**Authors response: We do agree that sometimes model averaging can be overused, however we consider that in this case it is appropriate. Supporting models were all relatively close in AIC and allowed for a more integrative approach to understanding the results from the perspective of sex differences.**

**We have included the table of other models in the supplementary materials.**

Line 246. These sentences are not clear. It is not clear if you used trips as energetic units or you also considered some periods at the colony.

**Authors response: This has been reworded and we hope it is clearer now. This paragraph has also been moved to line 331:**

“As gannet foraging trips may last several days, they incur increasing energetic costs during a foraging trip such as feeding chicks upon return, we have included this in the analysis by considering energetic differences from a whole sum approach and use individual energy expenditure per 24-hour period as the energetic unit.”

Line 247. So you calculated a foraging trip energy expenditure and a 24 hour period energy expenditure? Please clarify this aspect. Comparisons between females and males were performed for both time periods (foraging trip and 24-hour period)?

**Authors response (For queries on lines 246 and 247): 24 hour period was the energetic unit. We have clarified this in the text on line 336 (text provided above for line 246 query).**

Line 254. Did you mean the total amount of food they needed to eat to get the energy they expended? Cant this be achieved by eating more than one combination of prey proportions?

**Authors response: Yes, the Total Energetic Demand (TED) is the energy required to be captured by a gannet to meet the expenditure from behaviour and to feed a chick, assuming no change in body mass. This could be met by any combination of prey proportions, we have therefore used the average value of a successful prey catch from the isotopic modelling.**

Line 267-268. Please rephrase this sentence. It is not clear.

**Authors response: This has been reworded and is on line 440:**

“The number of dives successful dives required was then considered as a proportion of the number of dives undertaken; therefore presenting a minimum percentage of dives which must have been successful for each individual gannet to survive.”

Results.

Line 282. Does this mean that from one individual you couldn't determine the sex from the blood sample?

**Authors response: Yes, this has been clarified in the text on line 491:**

“Of the 14 gannets tracked, five were female, eight were male, and one was of unknown sex. due to inconclusive DNA test”

Line 290. Please explain better how this average LMER was obtained. It would be nice to see in a table all the models that showed delta AIC values higher than 6.

**Authors response: The model averaging was undertaken using the model averaging function in the MuMin package – we have included this in text (Line 432) and a table of models in the supplementary material.**

Line 316. Why here you present a Chi-square and in Line 313 an F? How did you get these statistics? This is not mentioned in the methodology.

**Authors response: Both models were tested against a null model in an ANOVA. Both models should have used an F test, as is appropriate for continuous data. This was an error and has been corrected and replaced with the F statistic.**

Figure 3. Please explain what each part of the boxplot means.

**Authors response: This has been included on the figure 3 caption**

Discussion

Line 385-387. This sentence is not clear. I would rather say that you focused on behaviors that imply movement. Certain behaviors do not imply movement and for that behaviors, VEDBA would not be useful.

**Authors response: This has been changed to include the emphasis on behaviours that imply movement and can be seen on line 732:**  
“as we studied the cost of behaviours that are implied by movement only”

Line 399-401. Energy expenditure can be affected by the medium in which an animal moves especially if the movement in different media involves different muscle groups.

**Authors response: Thank you, this has been reworded to change emphasis of sentence and can be seen on line 766:**

“Females diving more may expend relatively more energy as they spend more time underwater. However, energy expenditure can be affected by the medium an animal moves through (84) and this then may affect the sexes unevenly, though this is unlikely given the proportionally low energetic costs of diving.”

Line 449. It would be nice to see a table showing how much energy each bird expended in the different behaviors that comprise the foraging trip. In this table, the time engaged in each behavior could also be included.

**Authors response: Unfortunately, we do not have this information. As noted above, not being able to directly observe birds means that we could not confidently relate specific behaviours to signals within accelerometry data. Furthermore, as we now describe in more detail, our energetics methodology did not require a complete time budget to estimate total energy costs.**

Line 470-471. Can you please more information and specific examples about how

the bioenergetic approach presented in this study could contribute to future studies?

**Authors response: This has been expanded on line 897:**

“It would be interesting to see this study replicated using more obviously dimorphic species, where differences between the sexes are more clearly pronounced, or to examine how the sexes may differ in their energy expenditure with changing prey resources (96).”

**Reviewer comments to Author:**

**Reviewer: 1**

Comments to the Author(s)

I really enjoyed reading this manuscript! Well done. The introduction was great and flowed nicely, providing a background into sex-specific differences in foraging behaviour, its potential drivers (energy expenditure and diet), the methods used to investigate this and your study system. This set the manuscript up well.

**Authors response: Thank you for your positive comments. We have actually made some further refinements based on reviewer comments and following feedback after presenting some of this research at the World Seabird Conference.**

Are you able to provide any further information regarding the “marginal” sex differences in weight observed in gannets, that you mention within your introduction? Are the other sex differences in gannets that you mention (foraging behaviour and diet) considered to ubiquitous, or are they only true of particular populations from/foraging in particular locations?

**Authors response: We have included more information and provided some extra detail including weight differences and what this equates to in terms of % body mass. This can be seen on line 175:**

“While females are marginally heavier than males (Approximately 200g, or 6% (45)), weight alone cannot be used to sex individuals (45).”

In your methods section, your field methods are good and descriptive but could include a bit more detail with regards to the potential for loggers to have impacted the gannets’ behaviour/demographic parameters. Some would argue that total deployment weights as well as the weights of the birds (upon deployment and retrieval possibly) should be included.

**Authors response: A table of deployment and retrieval weights has now been included in the supplementary materials. We have also included a statement regarding the potential for individual behaviour effects from tagging on line 242-246.**

You also don’t currently provide any methodology behind logger retrievals, including how many birds/loggers were recaptured and when this occurred (i.e., how long the

deployment length was). I know that this is mentioned later within your results, but wonder whether it should be considered as more of a methodological point.

**Authors response: This has now been included on line 242:**

“Five female and eight male gannets were tagged over the two years. Birds were equipped with tags for an average of  $3.70 \pm 1.39$  days. To reduce potential impact on a breeding pair, only one individual of a pair was tagged for this study.”

I also wonder whether you should move your bloods methods to the Data Collection section, as I was surprised to read this section of text later on within your methods instead. Otherwise, perhaps you could rename your section heading methods so that they read “Biologging Data Collection” instead, or something similar.

**Authors response: We have now included more blood collection information in this section on line 256:**

“Blood samples were taken from the tarsal vein of 47 birds ( $n=19$  in 2017 and  $n=28$  in 2018), including the accelerometer-equipped birds, and used to construct a population model of dietary intake from isotope analysis (See section “*Isotopic Analysis for Diet Composition*” below). Between 1 and 1.5ml of blood was sampled for stable isotope analysis (see below) and 2-3 breast feathers were plucked for genetic sexing following the method outlined by Griffiths, Double (51).”

I feel that Figure 1 is a conceptual diagram of your study methods, as opposed to the actual study and your specific hypotheses?

**Authors response: This has been renamed as a conceptual diagram in the text.**

Please can you clarify the methods behind “confirming” TDR dives? Was this via visual inspection, as suggested in your Results?

**Authors response: This was done by visual inspection and detail has now been included in the text on line 292:**

“to validate accelerometer-derived dive events by visually comparing timestamps to TDR confirmed dives, this required each dive to be manually viewed and checked to compare with a dive from a TDR.”

I wonder whether it might be helpful to rearrange the order of your “Energetics from Accelerometry” section so that you first state what you are aiming to do with these methods, and then outline the steps that you took to achieve this goal.

**Authors response: This section has now received a rework and reordering of the text to make the method clearer this section can be seen from lines 298 to 365.**

I wonder whether the second paragraph of your “Statistical Analysis” section should feature earlier on as I’m not sure that it is really describing statistical analyses particularly. Perhaps this is also true of some of the following paragraph, i.e., the fish allometry etc.



**Authors response: The second paragraph has now been moved to the energetics from accelerometry section (Line 332 to 365) and much of the following paragraph is now under the isotope section (Line 416 to 424).**

When discussing sex differences in diving behaviour within your Results, perhaps considering including the percentage differences between some of the male and female metrics within the results would be helpful, rather than just the means of each sex.

**Authors response: Where appropriate we have now included this. This can be seen on line 500 and 506:**

“Combined cost of a single prey capture attempt (dive + take-off) in females was  $1.94 \pm 0.65$ kJ while for males it was  $1.74 \pm 0.83$ kJ, suggesting that male dives are 11.2% less costly than females. An averaged LMER indicated a significant effect of dive type and year on energy expenditure associated with dives, while sex was retained as a non-significant factor (Table 1, and Table S4 for model averaging results). The estimates for cost of all prey capture attempts represent < 4% of the daily total energy expenditure for each individual (Table S3). Accounting for unequal provisioning of the chick, and the cost of foraging, daily energetic demands were 10.28% higher for females than males”

I think that your table and figure headings could be more descriptive so that they are able to be easily interpreted as stand-alone items, without the remainder of the text being read. For example, you could include the species and colony that you are investigating.

**Authors response: Text in the captions has been updated where appropriate.**

I'm not sure whether I agree that there are not previous instances of the energetic cost of individual prey capture attempts being estimated in seabirds. Haven't seabird-mounted cameras paired with accelerometry been used to do this? Or devices that record beak opening events/changes in oesophageal temperature? Maybe I'm wrong, but perhaps these are methods that could also be mentioned in your Introduction if trying to estimate the energetic cost of prey capture attempts is a key goal of this manuscript.

**Authors response: That is correct – we have changed the text of the paragraph to reflect this. This paragraph is now on line 725.**

I think that your Discussion could generally do with another check through to ensure that the readability is as good as elsewhere in your manuscript and that it flows and covers all of the aspects that you want it to, in a way that flows and makes sense.

**Authors response: Thank you – we have edited throughout the document, particularly the discussion to ensure good flow.**

For example, I'm not totally sure what the goal of the large second paragraph is at the moment as you discuss a number of different results in turn throughout.

**Authors response: This paragraph has now been split into several paragraphs with more detailed discussion in each.**

Additionally, I think that L413-20 in particular could be streamlined a little to increase their readability. I know what you're trying to say, but I think that they could benefit from a little more editing, including the mention of it being the sexes that have divergent diets within the final sentence of this paragraph.

**Authors response: Thank you – we hope we have increased the readability here.**

I've recommended some grammatical changes to L421-7 too, but also wonder whether you could tie this back to the results of this manuscript a bit more. The same is also true of the following paragraph (L428-34) and elsewhere within your Discussion.

**Authors response: Thank you – we have incorporated how these may be reflected in our results. The section on egg production has been removed, as this is undertaken many weeks prior to our deployments and is unlikely to have impacted the observed behaviour.**

Some of your in-text citations seem to be in a strange format and should be double checked throughout.

**Authors response: Thank you – these have been checked and corrected.**

I've provided a marked-up document of the pdf with a few more small comments here and there, but otherwise, good job!

**Authors response: Thank you – the comments from the PDF are copied below for reference.**

**Further comments from PDF:**

Line 51: "The energetic cost?"

**Authors response: Inserted**

Line 73: "Consider including "for example" so that you introduce why you're talking about giant petrels now when the paragraph is so broad

**Authors response: Inserted**

Line 77: "are"?

**Authors response: Inserted**

Line 78: "breeding season,"

**Authors response: Inserted**

Line 97: "the"

**Authors response: Inserted**

Line 107: Rephrase sentence

**Authors response: This has been made clearer**

Line 107: How marginal please?

**Authors response: Approximately 200g or 6% body mass – the manuscript has been update to reflect this and provides a reference**

Line 116: consider “for whether male and female gannets target different sized prey items”

**Authors response: Inserted**

Line 121: Please consider adding a mention of gannets in this paragraph

**Authors response: Inserted**

Line 170: Please consider “Data from a subset of birds...”

**Authors response: Inserted**

Line 216: Please clarify which authors

**Authors response: Clarified and inserted a few more words to make sense.**

Line 288: Delete word “increased”

**Authors response: Deleted**

Line 291: The sentence needs a little bit of work perhaps a comma after “dives”

**Authors response: inserted comma – sentence flows better now**

Line 372: Writing “we suggest instead” would tie these sentences together nicely

**Authors response: Inserted**

Line 412: “after applying...”?

**Authors response: Sentence changed**

Line 422: Remove differing

**Authors response: Inserted**

Line 424: “females, forcing”

**Authors response: Inserted**

Line 425: “undertake”

**Authors response: Inserted**

Line 426: “habitat to males”

**Authors response: Inserted**

Line 435: “which may be reflective of”

**Authors response: Inserted**

Line 436: “than male gannets”

**Authors response: Inserted**

Line 441: I don't know whether you need the word previously here because of the estimates being for different species

**Authors response: Agreed and removed**

Line 447: I'd consider this sentence and breaking it down into multiple smaller ones

**Authors response: This sentence has been broken into smaller sentences and some rewording done to improve flow**

Line 448: questions (or something similar) rather than problems?

**Authors response: Changed to questions**

Line 449: “can be used to estimate the energetic costs of”

**Authors response: Inserted**

Line 453: consider “instead, such sexually”

**Authors response: Inserted**

Line 458: “through increasing their dive rate/rate of diving”?

**Authors response: Inserted**

## Appendix C

Dear Editor,

Please find attached our resubmitted manuscript '*A bioenergetics approach to understanding sex differences in the foraging behaviour of a sexually monomorphic species.*'

We were very happy to receive minor corrections after resubmitting this manuscript, having integrated comments from the review process. We have addressed all comments provided to us at this stage and we hope you agree that the changes we have made have improved the manuscript and that it is now suitable for publication. We have included two copies of the manuscript, one with tracked changes from the last review, and a second copy with no track changes. We hope this is suitable.

Best regards,

Ashley Bennison

Introduction.

Line 88. Please incorporate the Brown booby specific species name.

**Authors response: This has now been included**

Lines 137-144. I realize in the previous version my suggestion was to first state the objectives and afterwards the technology employed. In the present version I suggest first mentioning the main objective and methodology employed and afterwards mention the specific objectives. For example:

In the present study, we used GPS, accelerometry, and SIA data to gain a better understanding of how gannets engage in foraging and how different demands upon the sexes may affect foraging strategies. Specifically, we explore sex differences in foraging of gannets in terms of diet, dive types, frequency of prey capture attempts, and the energetic cost of prey capture attempts. Additionally, we quantify the energetic requirements of each sex, taking into account energy expended during foraging and, using data from published studies, energetic demands of feeding offspring. Finally, we consider minimum dive success rates necessary for male and female gannets to meet their energy demands.

**Authors response: This has been reworded as requested – thank you for your suggestion.**

Lines 151-157. Hypothesis. The first one is fine however, the second and the third one are predictions not hypotheses. Please rephrase them.

**Authors response: The hypotheses have been reworded to reflect the change between prediction and hypothesis.**

Methods

Line 174. Please revise the numbers, here the total number of instrumented birds is 14 and below is 13. Please state how many females and males were equipped each year.

**Authors response: This has now been clarified the total of 13 did not account for the individual of unknown sex. This has now been clarified and states:**

“In 2017; three female, four male, and one unknown gannets were tagged, four males and two females were then tagged in 2018.”

Line 175. Please change for 52° 7' 37.92" N, 6° 35' 45.6" W

**Authors response: This has been changed.**

Line 181. Which was the depth threshold? 0.5 or 1 m? Or some devices were programmed with a 0.5 threshold and some with a 1 m threshold? Please clarify this aspect.

**Authors response: Devices were mixed in the programming – as we tried to make the best regime possible. This has now been clarified and states:**

“after exceeding depth threshold of either 0.5m or 1m depending upon tag setup”

Line 189. Is a period missing after (52)? The following that starts with “Previous” sounds a bit awkward, please rephrase it.

**Authors response: We were missing a period. Thank you it has now been inserted.**

Line 189. the “s” in gannets looks like a subscript letter.

**Authors response: This has been corrected and is the appropriate size again.**

Line 192. This is the first time a table of the Supplementary information is mentioned so I suggest considering this table as table S1 instead of table S5. Please check that all Supp. table numbers are correctly mentioned in the main document after they are renumbered.

Line 268. For example, this would be table S2 now.

**Authors response to lines 189 and 268: We have now checked and reordered the supplementary material so that supplementary materials appear in order.**

Line 293-297. This sentence is too long and not clear. Please rephrase it.

**Authors response: This sentence has been broken into three smaller sentences.**

Line 336. Please check Supplementary information Table numbers.

**Authors response: The supplementary tables have now been ordered appropriately.**

Line 368. It is not clear to me how you test for differences in diving rate between sexes using linear regression. Please clarify this aspect.

**Authors response: This has been clarified as a general linear model and that sex is a predictive factor with dive rate as a response variable.**

Results.

Line 421. Please mention in the methods how you tested for differences in body mass between sexes.

**Authors response: This has now been included on line 346.**

Line 426. Why didn't you test for differences in dive duration between sexes?

**Authors response: We have now included this as an unpaired t-test reporting no significant differences in dive length between males and females. We have also included a statement in the methods stating this would be done.**

Line 428. Why didn't you test for differences in dive + take off costs between sexes?

**Authors response: This was tested more formally as part of the averaged LMER that used sex as a factor in the model predicting cost of dive.**

Line 461. In the methods, you mention that differences in the diving rate between sexes were tested by means of linear regression and here a GLM is mentioned. Please clarify this aspect.

**Authors response: We have clarified in the methods that it is in fact a GLM.**

Line 501. You can say KIV instead of "average energy intake (KIV)" since you have already defined what KIV stands for.

**Authors response: This has been amended as suggested.**

Discussion

Line 586. Please eliminate "do" from "Females may have to do dive more".

**Authors response: This has been removed.**

Line 596. "gannets" can be eliminated here since it is clear you are talking about gannets.

**Authors response: This has now been removed**
